1                   **Genomic and morphologic characterization of a planktonic *Thiovulum***  
2                   **(*Campylobacterota*) dominating the surface waters of the sulfidic Movile Cave, Romania**

3                   Mina Bizic<sup>1,2,\*#</sup>, Traian Brad<sup>3,4,\*#</sup>, Lucian Barbu-Tudoran<sup>5</sup>, Joost Aerts<sup>6</sup>, Danny Ionescu<sup>1,2</sup>,  
4                   Radu Popa<sup>7, 8</sup>, Jessica Ody<sup>9</sup>, Jean-François Flot<sup>9, 10</sup>, Scott Tighe<sup>11</sup>, Daniel Vellone<sup>11</sup>, and  
5                   Serban M. Sarbu<sup>8, 12, 13</sup>

6  
7                   <sup>1</sup> Leibniz Institute for Freshwater Ecology and Inland Fisheries, IGB, Dep 3, Experimental  
8                   Limnology, Alte Fischerhütte 2, OT Neuglobsow, 16775 Stechlin, Germany

9                   <sup>2</sup> Berlin-Brandenburg Institute of Advanced Biodiversity Research (BBIB), Berlin, Germany

10                  <sup>3</sup> “Emil Racoviță” Institute of Speleology, Clinicilor 5-7, 400006 Cluj-Napoca Romania,

11                  <sup>4</sup> Institutul Român de Știință și Tehnologie, Str. Virgil Fulicea nr. 3, 400022 Cluj-Napoca,  
12                  Romania

13                  <sup>5</sup> Center for Electron Microscopy, “Babeș-Bolyai” University, Clinicilor 5, 400006 Cluj-  
14                  Napoca, Romania

15                  <sup>6</sup> Department of Molecular Cell Physiology, Faculty of Earth and Life sciences, De Boelelaan  
16                  1085, 1081 HV Amsterdam, The Netherlands

17                  <sup>7</sup> River Road Research, 62 Leslie St. Buffalo, NY 14211

18                  <sup>8</sup> Emil G. Racoviță Institute, Babes-Bolyai University, Cluj-Napoca 400006, Romania

19                  <sup>9</sup> Evolutionary Biology and Ecology, Université libre de Bruxelles (ULB), C.P. 160/12,  
20                  Avenue F.D. Roosevelt 50, 1050 Brussels, Belgium

21                  <sup>10</sup> Interuniversity Institute of Bioinformatics in Brussels – (IB)<sup>2</sup>, Brussels, Belgium

22                  <sup>11</sup> Vermont Integrative Genomics Lab, University of Vermont Cancer Center, Health Science  
23                  Research Facility, Burlington, Vermont, 05405

24                  <sup>12</sup> Emil Racoviță Institute of Speleology, str. Frumoasă 31, 010986 București, Romania

25                  <sup>13</sup> Department of Biological Sciences, California State University, Chico, USA

26  
27                  \* Authors have contributed equally to the work

28  
29                  # Corresponding authors

30                  Mina Bizic: mbizic@igb-berlin.de

31                  Traian Brad: traian.brad@iser.ro

32  
33                  **ORIGINALITY SIGNIFICANCE STATEMENT**

34                  We identify *Thiovulum* sp. as a dominant bacterium in subsurface floating microbial agglom-  
35                  erations in a hypoxic cave system. We show for the first time that *Thiovulum* can be found in  
36                  high abundance in planktonic environments dissociated from solid surfaces. We provide the  
37                  complete genome of this organism and suggest that it is capable of dissimilatory nitrate reduc-  
38                  tion to ammonia using sulfur as the electron donor, thus contributing to both the cave’s nitrogen  
39                  and sulfur cycles. Based on sequence similarity, this clade of *Thiovulum* spp. may be common  
40                  and important in other sulfidic caves. Last, we propose that the short peritrichous flagella-like  
41                  structures of *Thiovulum* are type IV pili rather than actual flagella.

42

## 43 ABSTRACT

44 Life in Movile Cave (Romania) relies entirely on primary carbon fixation by bacteria oxidizing  
45 sulfide, methane and ammonia with oxygen, nitrate, sulfate, and ferric iron. There, large  
46 spherical-ovoid bacteria (12-16  $\mu\text{m}$  diameter), rich in intracellular sulfur globules, dominate the  
47 stable microbial community in the surface water of a hypoxic Air Bell. These were identified  
48 as *Thiovulum* sp. (*Campylobacterota*). We obtained a closed genome of this *Thiovulum* and  
49 compared it to that of *Thiovulum* ES. The genes for oxidizing sulfide to sulfate are absent,  
50 therefore, *Thiovulum* likely avoids constant accumulation of elemental sulfur either by  
51 oxidizing sulfide to sulfite which is then excreted, or via dissimilatory nitrate reduction to  
52 ammonia using the formate-dependent nitrite reductase or hydroxylamine oxidoreductase. Thus,  
53 *Thiovulum*, found also in other caves, is likely important to both S and N cycles in subterranean  
54 aquatic ecosystems. Additionally, using electron microscopy, we suggest that in absence of  
55 motor-like structures along the membrane, the peritrichous flagella-like structures are type IV  
56 pili, for which genes were found in both *Thiovulum* genomes. These pili may play a role in veil  
57 formation, connecting adjacent cells. The force exerted by coordinated movement of such pili  
58 may partly explain the exceptionally fast swimming of these bacteria.

59 Key words: *Thiovulum*, sulfur, DNRA, Movile Cave, sulfide-oxidation, stable isotope analysis

60

## 61 INTRODUCTION

62 Cave ecosystems, typically characterized by stable conditions, provide a window into  
63 subsurface microbiology (Engel, 2015). In the absence of natural light, these ecosystems are  
64 typically fueled by chemolithoautotrophy via the oxidation of reduced compounds such as  $\text{H}_2\text{S}$ ,  
65  $\text{Fe}^{2+}$ ,  $\text{Mn}^{2+}$ ,  $\text{NH}_3$ ,  $\text{CH}_4$ , and  $\text{H}^+$ . In sulfidic ecosystems,  $\text{H}_2\text{S}$  oxidation may be performed by  
66 animal-microbial symbioses such as the *Niphargus-Thiotrix* association (Bauermeister *et al.*,  
67 2012; Flot *et al.*, 2014).

68 Discovered at the bottom of an 18-m deep geological survey shaft in 1986, Movile Cave is  
69 located near the town of Mangalia, SE Romania (43°49'32"N, 28°33'38"E), 2.2 km from the  
70 Black Sea shore. It consists of a 200 m long upper dry passage that ends in a small lake allowing  
71 access to a 40 m long, partially submerged lower cave level (Fig. 1). Thick and impermeable  
72 layers of clays and loess cover the limestone in which the cave is developed, preventing input  
73 of water and nutrients from the surface (Lascu *et al.*, 1994).

74 Sulfidic groundwater flows constantly at the bottom of Movile Cave's lower passages. This  
75 flow occurs down to over 1 m below the water surface at flow rates of about  $5 \text{ l s}^{-1}$  (Sarbu and  
76 Lascu, 1997), which equates to a flow velocity of approximately  $5 \text{ cm s}^{-1}$  in the Lake Room  
77 area. Yet, because of the morphology of the lower cave passages (Fig. 1) and slight difference  
78 in water temperatures, the water near the surface is practically stagnant. Earlier work by Riess  
79 *et al.* (1999) analyzed the change in the concentration of  $\text{O}_2$  in the water column and found  
80 traces of oxygen up to a maximum depth of 0.8 mm, below which the water was anoxic.

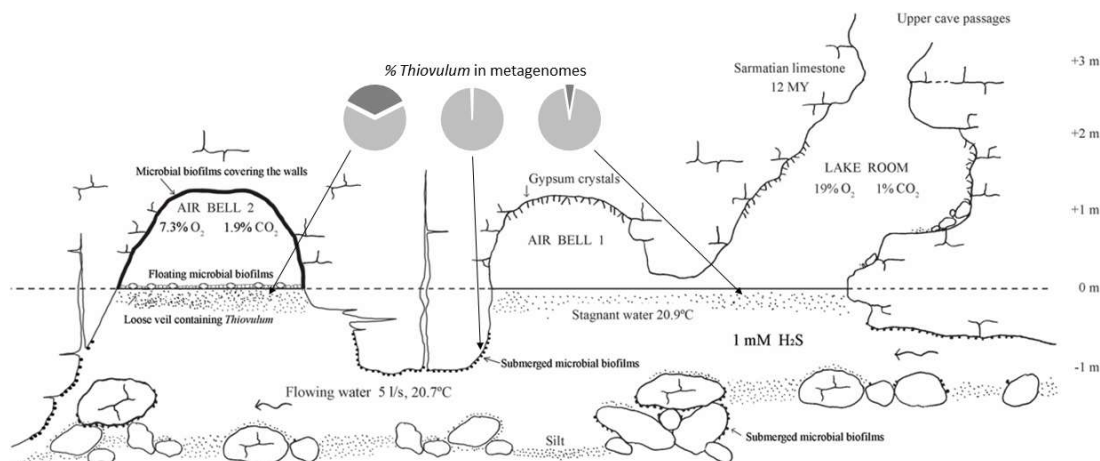

81

82 **Figure 1.** Longitudinal profile of the sampling area in Movile Cave (modified after Sarbu and  
83 Popa, 1992). The microbial community containing *Thiovulum* cells (depicted here as dots  
84 present beneath the water surface) was sampled in the Lake Room and in air bells 1 and 2.  
85 *Thiovulum* 16S rRNA made up 5 %, 0.9 % and 35 % of the 16S rRNA genes retrieved from  
86 metagenomic samples (dark gray in pies) from these cave sections, respectively.

87

88 Chemoautotrophic microorganisms living at the water surface oxidize reduced chemical  
89 compounds such as H<sub>2</sub>S, CH<sub>4</sub> and NH<sub>4</sub><sup>+</sup> from the thermo-mineral groundwater (Sarbu and Kane,  
90 1995; Sarbu, 2000). Most of the microbiological studies performed in Movile Cave  
91 (summarized in Kumaresan *et al.*, 2014) are based on samples of microbial biofilms floating  
92 on the water surface or covering rock surfaces in the cave's air bells (Fig. 1), where the atmosphere  
93 is poor in O<sub>2</sub> (7-10 %) and enriched in CO<sub>2</sub> (2.5 %) and methane (1-2 %) (Sarbu, 2000).  
94 *Thiobacillus*, *Thiothrix*, *Thioploca*, *Thiomonas* and *Sulfurospirillum* oxidize H<sub>2</sub>S using O<sub>2</sub> or  
95 NO<sub>3</sub><sup>-</sup> as electron acceptors (Rohwerder *et al.*, 2003; Chen *et al.*, 2009; Flot *et al.*, 2014). The  
96 methanotrophs *Methylomonas*, *Methylococcus* and *Methylocystis* (Hutchens *et al.*, 2004),  
97 *Methanobacterium* (Schirmack *et al.*, 2014) and *Methanosarcina* (Ganzert *et al.*, 2014) are also  
98 found in the cave, alongside other methylothrophs such as *Methylothenera*, *Methylophilus* and  
99 *Methylovorus* (Rohwerder *et al.*, 2003; Chen *et al.*, 2009). Chen *et al.*, (2009) further identified  
100 in the cave ammonia and nitrite oxidizers from the genera *Nitrospira* and *Nitrotoga*.

101 Directly below the water surface in the lower level of Movile Cave, we observed a loose floating  
102 veil resembling a slow-moving white cloud (Fig. 2 and Supplementary video 1). When the water  
103 was not disturbed, the veil formation was evenly dispersed, yet not deeper than 2-3 mm below  
104 the water surface. Occasionally, this veil was disturbed by feeding invertebrates including  
105 dendrocoelid flatworms (*Dendrocoelum obstinatum*), cyclopoid copepods (*Eucyclops*  
106 *subterraneus scythicus*), and niphargid amphipods (*Niphargus dancaui* and *Niphargus*  
107 *racovitzae*) (Brad *et al.*, 2015; Stocchino *et al.*, 2017; Sarbu *et al.*, 2019).

108 Using genetic and microscopic analysis, we concluded that this underwater agglomeration of  
109 bacteria is dominated by a species of the genus *Thiovulum*. To the best of our knowledge, this  
110 is the first description of planktonic *Thiovulum* swarms/veils at considerable distance from any  
111 solid surface. Here we provide further morphological and genomic information on this  
112 bacterium, offering new insights into its metabolic properties and raising novel questions.

113

## 114 MATERIALS AND METHODS

115 Replicate samples of water were collected into sterile containers from the surface of the small  
116 sulfidic lake and from the air-bells in the lower section of Movile Cave (Fig. 1). Unpreserved  
117 50 ml water samples were immediately brought to the laboratory and inspected by optical  
118 microscopy, while other 50 ml water samples preserved with ethanol to a final concentration of  
119 50 % and later used for DNA extraction. Additionally, 15-ml water samples were preserved  
120 with formaldehyde to a final concentration of 4 % and were later used to estimate the density  
121 of bacterial cells under an optical microscope by direct counts on a squared slide, using a  
122 defined sample volume (i.e. 5 ml).

### 123 *Electron microscopy and elemental analysis*

124 Two 15-ml samples collected from the water surface in Movile cave were centrifuged, and the  
125 microorganisms were resuspended and fixed for 2 h with 2.7 % glutaraldehyde in phosphate  
126 buffered saline (1× PBS). The cells were then rinsed three times in 1× PBS, and finally fixed  
127 for 1 h with 2 % osmic acid in 1× PBS. The cells were harvested again by centrifugation,  
128 dehydrated in graded acetone-distilled water dilutions, and embedded in epoxy resin. Sections  
129 of about 100 nm thickness were produced with a diamond knife (Diatome, Hatfield) using a  
130 Leica UC6 ultramicrotome (Leica Microsystems, Wetzlar, Germany) and were stained with lead  
131 citrate and uranyl acetate (Hayat, 2001). The grids were examined with a Jeol JEM transmission  
132 electron microscope. Samples for scanning electron microscopy (SEM) were fixed with 2.7 %  
133 glutaraldehyde in 1× PBS, air dried on 0.22 µm mesh-sized Millipore filters, sputter coated with  
134 10 nm gold and examined on a JEOL JSM 5510 LV microscope (Jeol, Japan). Energy-dispersive  
135 X-ray spectroscopy (EDX) analysis was performed with an EDX analyzer (Oxford Instruments,  
136 Abingdon, UK) and with the INCA 300 software.

### 137 *Stable isotope analysis*

138 Surface water from the Lake Room (Fig. 1) was collected in a sterile 1 l Nalgene bottle and  
139 passed through a plankton net to remove any aquatic fauna and particles of floating microbial  
140 mats. The water was then filtered through ashed fiberglass filters (that had previously been  
141 heated at 1000 °C for an hour to remove carbonates and organic molecules). The filters were  
142 then dried at 60 °C for 24 h and sent to the Water Research Center of the University of Alaska  
143 in Fairbanks for carbon and nitrogen stable isotope analysis. Additional samples of water from  
144 the lake were collected in sterile 1 l Nalgene bottles and the H<sub>2</sub>S was precipitated with Cd-  
145 acetate and then filtered through ashed fiberglass filters that retained the precipitate. Gypsum  
146 crystals were also collected from the cave walls above the water in the Lake Room to determine  
147 the stable isotope ratios of sulfur. After being dried, the filters were sent along with samples of  
148 gypsum to the Stable Isotope Laboratory of the University of Indiana for sulfur stable isotope  
149 analysis.

### 150 *gDNA Extraction*

151 Bacteria from water samples were concentrated using a vacuum pump and Nalgene's single-  
152 use analytical filter funnels (Thermo Fisher Scientific, MA, USA), with the included filter  
153 replaced with a 0.2 µm isopore membrane filter (Millipore Sigma, MA, USA). Prior to filtration,  
154 the glass assembly components were autoclaved at 121.5 °C for 30 min wet and 20 min dry at  
155 1.4 bar (20 psi). Filters were placed into 50 µl conical tubes with 300 µl 1× PBS, 1.5 µl 2 %  
156 azide, and a sterile scalpel blade. Samples were minced using an OMNI bead ruptor elite (OMNI  
157 International, GA, USA) on a 4 m s<sup>-1</sup> 30 sec program. The resulting sample was centrifuged to  
158 collect bacteria separated from the filters and extracted for gDNA using a modified version of  
159 the Omega BioTek Universal Metagenomics kit protocol (OMEGA Bio-tek, GA, USA). Fifteen  
160 µl of MetaPolyzyme (Millipore Sigma, MA, USA) was added to each sample and incubated at

161 35 °C for 13 h followed by three cycles of freeze and thaw alternating between 80 °C for 2 min  
162 and a -80 °C freezer for 10 min. Further digestion was subsequently performed by adding 35 µl  
163 Proteinase K (Omega Bio-tek, GA, USA) and incubated at 55 °C for 1 hour. Following complete  
164 enzymatic digestion, the sample was extracted using the manufacturer's protocol (Omega  
165 BioTek Universal metagenomics kit). Briefly, 500 µl ML1 buffer (CTAB) was added the  
166 digested sample and incubated at 55 °C for 15 min. One volume of Tris-stabilized (pH >7.5)  
167 phenol-chloroform-isoamyl alcohol mix (25:24:1) was used for purification and the resulting  
168 upper aqueous phase was removed and combined with RBB (Guanidinium) and 100 % EtOH  
169 and applied to a DNA silica column supplied with the kit. Final DNA was eluted in 35 µl of  
170 elution buffer. DNA was quantified using a Qubit spectrofluorometer and Nanodrop ND-1000  
171 (ThermoFisher Waltham MA USA).

### 172 *16S rRNA gene amplicon sequencing and processing*

173 PCR reactions were performed in triplicate. Each 25 µl reaction consisted of 0.5 µl of Phusion  
174 Green Hot Start II high-fidelity DNA polymerase (Thermo Fisher Scientific, Sweden), 5.0 µl  
175 of 5× Phusion Green HF buffer, 4 µl DNase- and RNase-free water, 5.0 µl of 10 µM primer mix  
176 (1:1), 0.5 µl of 10 mM nucleotide mix and 10 µl of DNA extract (0.5 ng/µl). The PCR protocol  
177 was 98 °C for 30 sec, 33 cycles of 98 °C for 10 sec, 55 °C for 30 sec, 72 °C for 30 sec and a  
178 final 5-min extension at 72 °C. The amplicon target was the V3-V4 region of the 16S rRNA  
179 gene, using the V3 forward primer S-D-Bact-0341-b-S-17, 5'-CCTACGGGNGGCWGCAG-3  
180 (Herlemann *et al.*, 2011), and the V4 reverse primer S-D-Bact-0785-a-A-21, 5'-  
181 GACTACHVGGGTATCTAATCC-3 (Muyzer *et al.*, 1993), resulting in fragments of ~430 bp.  
182 The primers were dual barcoded in a way compatible with Illumina sequencing platforms (as  
183 described in Caporaso *et al.*, (2011). Product size and successful amplification was tested by  
184 running internal positive and negative controls from the triplicate plates on a 1.5 % (w/v)  
185 agarose gel. Triplicate PCR products were combined, and each triplicate sample was purified  
186 using SPRI beads (Agencourt® AMPure® XP, Beckman Coulter, CA, USA). DNA concentration  
187 of purified samples was determined with a Quant-iT high-sensitivity DNA assay kit and a  
188 Qubit® fluorometer (Invitrogen, Carlsbad, USA). All samples were diluted to similar  
189 concentrations prior to pooling diluted PCR products together in equimolar volumes (50 µl) in  
190 one composite sample (including positive and negative controls).

191 Composite samples were paired-end sequenced at the Vrije Universiteit Amsterdam Medical  
192 Center (Amsterdam, The Netherlands) on an Illumina MiSeq Sequencer with a 600-cycle  
193 MiSeq Reagent Kit v3 (Illumina, San Diego, Ca, USA) according to the manufacturer  
194 instructions. Sequences were quality trimmed using Trimmomatic (v 0.39) and paired using  
195 Bbmerge (Bushnell *et al.*, 2017). The paired sequences were dereplicated using the dedupe tool  
196 of the BBTools package ([sourceforge.net/projects/bbmap/](https://sourceforge.net/projects/bbmap/)) aligned and annotated using the  
197 SINA aligner (Pruesse *et al.*, 2012) against the SILVA SSU database (v 138) (Quast *et al.*, 2012).

198 A maximum-likelihood tree was calculated using FastTree 2 (Price *et al.*, 2010). For the sake  
199 of legibility, the 908 *Thiovulum* sequence variants obtained were clustered at 97 % similarity  
200 using CD-HIT-EST (Huang *et al.*, 2010), resulting in 50 clusters. Three 16S rRNA sequences  
201 obtained from the genome assembly (see below) were included in the tree as well. All  
202 *Thiovulum* sequences available in the SILVA database (71 in total) were clustered separately in  
203 a similar manner, resulting in 22 clusters used in the final tree. Non-*Thiovulum* sequences  
204 belonging to the *Sulfurimonadaceae* family were used as an outgroup.

205 To obtain information on relative *Thiovulum* abundance, the raw short-read libraries (amplicon  
206 and metagenomic) were analyzed with phyloFlash (V 3.3; (Gruber-Vodicka *et al.*, 2020)).



## 207 Shotgun sequencing (Illumina and Oxford Nanopore)

208 Shotgun sequencing was accomplished using both Illumina and Oxford Nanopore sequencing  
209 technologies. For Illumina sequencing, 1 ng of genomic DNA from each sample was converted  
210 to whole-genome sequencing libraries using the Nextera XT sequencing reagents according to  
211 the manufacturer's instructions (Illumina, San Deigo CA). Final libraries were checked for  
212 library insert size using the Agilent Bioanalyser 2100 (Agilent Technologies Santa Clara, CA)  
213 and quantified using Qubit spectrofluorometry. The final sample was sequenced using paired  
214 end 2x150 sequencing on an Illumina MiniSeq system.

215 A first pass of Oxford Nanopore sequences was obtained using the SQK LSK109 ligation  
216 library synthesis reagents on a Rev 9.4 nanopore flow cell with the GridION X5 MK1  
217 sequencing platform, resulting in a total of 131.8 Mbp of reads with a N50 of 1.3 kbp.

218 Additionally, sequencing was performed on several cellular aggregates that were confirmed  
219 microscopically to contain *Thiovulum* cells. For this, the aggregates were picked from  
220 environmental samples fixed in RNAlater (4 M (NH<sub>4</sub>)<sub>2</sub>SO<sub>4</sub>; 15 mM EDTA (from 0.5 M, pH 8.0

221 stock); 18.75 mM Na-citrate (from 1M stock)), and washed several times in sterile 1× PBS  
222 buffer (137 mM NaCl; 2.7 mM KCl; 10 mM Na<sub>2</sub>HPO<sub>4</sub>; 1.8 mM KH<sub>2</sub>PO<sub>4</sub>; pH 7.4). The cell  
223 aggregates were lysed by freeze thawing and further, following the manufacturer's instructions,  
224 as part of the DNA amplification process using the Repli-G single cell amplification kit  
225 (Qiagene, Hilden, Germany). Libraries for Nanopore sequencing were prepared using the LSK-  
226 108 kit following the manufacturer's protocol but skipping the size selection step. The prepared  
227 libraries were loaded on MIN106 R9 flow cells, generating a total of 5.7 Gbp of reads with a  
228 length N50 of about 3.7 kbp. Basecalling for all Oxford Nanopore reads were done using Guppy  
229 4.0.11.

230 All sequencing data generated in this study were deposited in NCBI Sequence Read Archive  
231 under accession number PRJNA673084.

## 232 Metagenomic data analysis

233 Nanopore reads were assembled using Flye 2.8.1-b1676 (Kolmogorov *et al.*, 2019) with default  
234 parameters. The resulting GFA was examined using Bandage (Wick *et al.*, 2015), allowing to  
235 delineate a set of high-coverage (>300X) contigs against a background of low-coverage  
236 (<100X) contigs. To verify that these high-coverage contigs corresponded to *Thiovulum*, the  
237 published proteome of *Thiovulum* ES (Marshall *et al.*, 2012). was aligned on the GFA using  
238 tblastn (Gertz *et al.*, 2006) within Bandage (parameters: minimum identity 70 %, minimum  
239 coverage 70 %), revealing that nearly all tblastn hits were concentrated on the high-coverage  
240 contigs and vice-versa. The GFA was therefore pruned to retain only the high-coverage contigs,  
241 which were all interconnected. The remaining 31 contigs were exported as FASTA then  
242 scaffolded using SLR (Luo *et al.*, 2019); the nine resulting scaffolds were mapped back to the  
243 GFA to resolve most repeats, and the remaining repeats were resolved manually until obtaining  
244 a circular genome. A final polishing step was performed with unicycler-polish from Unicycler  
245 v0.4.9b (Wick *et al.*, 2017) using the complete set of Illumina reads (for a total depth of  
246 coverage of 12X of the genome) and the subset of Nanopore reads longer than 5 kb (*ca.* 50X).  
247 Polishing consisted of two cycles of pilon 1.23 (Walker *et al.*, 2014), one cycle of racon 0.5.0  
248 (Vaser *et al.*, 2017) followed by FreeBase (Garrison and Marth, 2012), then 30 additional cycles  
249 of short-read polishing using pilon 1.23, after which the assembly reached its best ALE score  
250 (Clark *et al.*, 2013).

251 The completeness of the *Thiovulum* genome obtained was assessed using CheckM (Parks *et*  
252 *al.*, 2015) and its continuity using the unicycler-check module in Unicycler v0.4.9b. Annotation

253 was performed using Prokka (Seemann, 2014), KEGG (Kanehisa *et al.*, 2016), the EggNOG  
254 5.0 online tool (Huerta-Cepas *et al.*, 2019), PATRIC (Brettin *et al.*, 2015; Davis *et al.*, 2020)  
255 and RAST (Aziz *et al.*, 2008; Overbeek *et al.*, 2014) annotation servers. A COG (Tatusov *et al.*,  
256 2000) analysis was done using the ANVIO tool (Eren *et al.*, 2015). To further elucidate the  
257 function of genes annotated as hypothetical proteins, a structural annotation was done using the  
258 Superfamily and SCOP databases using the Superfam online interface (Gough *et al.*, 2001).

259

## 260 RESULTS

### 261 Field observations

262 A pale-white loose veil, with a vertical thickness of 2 to 3 mm, was observed below and adjacent  
263 to the water surface in Movile Cave (Fig. 2). This resembled microbial veils described earlier  
264 as mucilaginous structures often produced by sulfur-oxidizing bacteria (Garcia-Pichel, 1989;  
265 Fenchel, 1994) under specific O<sub>2</sub> and H<sub>2</sub>S conditions. Nevertheless, in Movile Cave, the dense  
266 agglomeration of cells does not form slime or strongly cohesive veils, but a loose cloud-like  
267 white veil close to the water surface.

268

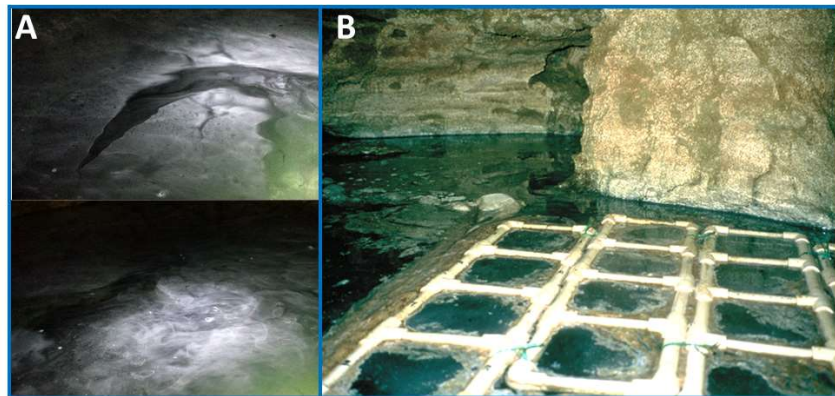

269

270 **Figure 2.** Images of subsurface cloud (veil) from the Lake Room (A) and Air Bell 2 (B) in  
271 Movile Cave. See also Supplementary Video 1.

### 272 Microscopy

273 Veils similar to those seen in the Lake Room (Fig. 2A) were also observed in air bell 1 and even  
274 more so in air bell 2 (Fig 2B) where they reached the highest densities. In air bell 2 these veils  
275 consist of large, spherical to ovoid, bacterial cells (Fig. 3A-B) identified as belonging to the  
276 genus *Thiovulum*. These cells have a diameter of 12-16  $\mu\text{m}$  and occur in densities of  
277 approximately  $5.5 \times 10^3$  cells/ml, resembling a dense bacterial culture (Fig. 2, Supplementary  
278 Video 1). Each cell contains up to 20-30 sulfur globules of various shapes and sizes that are  
279 responsible for the white appearance of the veil (Fig. 3). Transmission Electron Microscope  
280 (TEM) observations showed that these large cells are Gram-negative (Fig. 3C-D), like all  
281 *Campylobacterota* (formerly *Epsilonproteobacteria*; *Campylobacterales*), and confirmed the  
282 existence of irregularly shaped sulfur inclusions within the cells. Light microscopy suggested  
283 *Thiovulum* cells divide along the long cell axis (Fig. 3B). This was confirmed by the TEM  
284 images showing two dividing cells sharing the same cytoplasmic spaces prior to the complete  
285 closing of the cell membrane (Fig. 3C). Short peritrichous flagella fragments (Fig. 3D) observed  
286 on the surface of the cells resemble those noticed earlier in *Thiovulum* species (Wirsen and  
287 Jannasch, 1978). Scanning electron microscopy (SEM) depicts the ball-like structure of the

288 sulfur inclusions in a series of connected *Thiovulum* cells (Fig. 3E). These cells are connected  
289 one to the other via multiples threads (Fig. 3F-G). Energy-dispersive X-ray (EDX) analysis (Fig.  
290 3H-I) revealed that the intracellular globules are dominated by sulfur (20.9 - 26.1 %), along  
291 with elements common in organic matter such as carbon (49 - 49.2 %) and oxygen (21.1 -  
292 24.6 %), and a few other elements in low abundance such as sodium (2.4 - 3.4 %) and  
293 phosphorus (1.2 - 2.2 %).

294

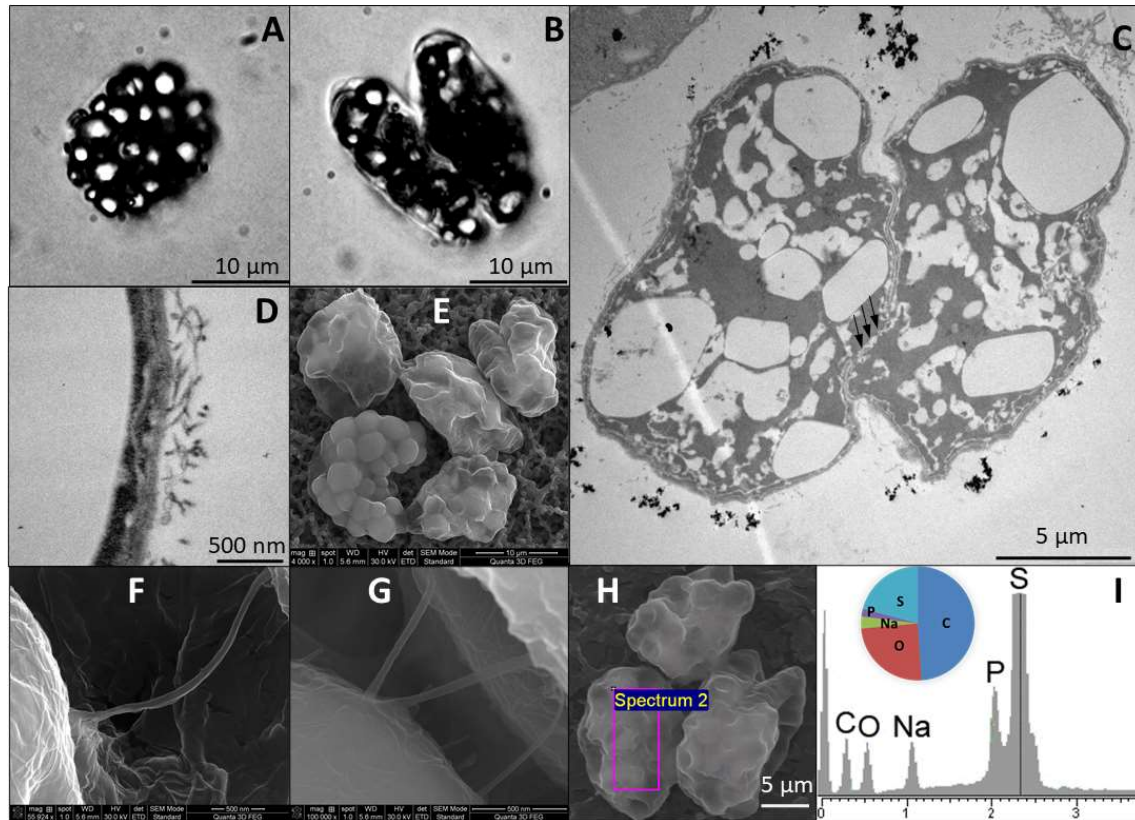

295

296 **Figure 3.** Optical images of giant globular cells colonizing the subsurface cloud/veil from  
297 Movile Cave (A-B) including a cell undergoing division (B). Each cell carries up to 30 sulfur  
298 inclusions (large bright spots in panels A, B). TEM images of *Thiovulum* show the cellular  
299 localization of sulfur inclusions of various shapes and sizes (panel C, white spots). Ovoid cells  
300 divide along their long axis (B, C). The region where the cell membrane is not fully closed  
301 between dividing cells is marked by with three black arrows (C). The cell wall (D) is covered  
302 in pili or short flagella. *Thiovulum* cells (E) are often connected one to another through thread-  
303 like structures (F-G). EDX analysis on *Thiovulum* cells (H) inspected under SEM show the  
304 typical elemental composition of the cells (I) and confirm the high sulfur content of the internal  
305 globules. Note that the height of the peaks in the EDX spectra do not correlate with the  
306 element's ratio, but with the X-ray signal intensity.

307

### 308 Laboratory observations

309 Water samples were collected from the cave and brought to the lab within one hour of sampling  
310 for optical microscopy observations. Upon exposure to the microscope light, the cells became  
311 very active and moved fast in all directions, a behavior similar to that observed in *Thiovulum*  
312 *majus* (Fenchel, 1994). After a few hours of swimming (Supplementary Video 2), the cells



313 slowed down and gathered in certain areas on the glass slide, while some cells turned around  
314 and swam in the reverse direction.

315 Within 24 h after being removed from the cave, the cells became inactive and most of them  
316 lysed, releasing their sulfur globules. Attempts to obtain the *Thiovulum* cells in culture were  
317 unsuccessful; however, we were able to devise a laboratory setup (Fig. S1) that resulted in a  
318 *Thiovulum*-enriched culture by mimicking as much as possible the cave conditions (i.e. constant  
319 temperature, darkness, high relative humidity, and sulfidic water from the cave).

320

### 321 Stable isotope analysis

322 Both the carbon and the nitrogen stable isotope ratios of the *Thiovulum* cells collected from the  
323 water surface in Movile Cave (Table 1) ( $\delta^{13}\text{C} = -44.53 \text{ ‰}$  and  $\delta^{15}\text{N} = -10.29 \text{ ‰}$ ) were among  
324 the lightest values measured in Movile Cave (Sarbu *et al.*, 1996).

325

326 Table 1. Stable isotope ratios of carbon and nitrogen of microbial samples collected in Movile  
327 Cave.  $\delta^{13}\text{C}$  and  $\delta^{15}\text{N}$  are expressed as ‰.

|                                           | $\delta^{13}\text{C}$ values (‰) | $\delta^{15}\text{N}$ values (‰) |
|-------------------------------------------|----------------------------------|----------------------------------|
| <i>Thiovulum</i> microorganisms           | -44.53 ‰                         | -10.29 ‰                         |
| Biofilms floating in the cave's air-bells | -44.54 to -45.82 ‰               | - 10.09 to -10.84 ‰              |
| Submerged microbial biofilms              | -43.23 ‰                         | -9.98 ‰                          |

328

329 Table 2. Stable isotope ratios of sulfur from  $\text{HS}^-$  from the cave water,  $\text{S}^0$  from sulfur granules  
330 within *Thiovulum* microorganisms swimming in the cave lake, and  $\text{SO}_4^{2-}$  from the gypsum  
331 crystals covering the cave walls above the lake.  $\delta^{34}\text{S}$  are expressed as ‰.

|                                                                                     | $\delta^{34}\text{S}$ values (‰) |
|-------------------------------------------------------------------------------------|----------------------------------|
| $\text{HS}^-$ from the cave water                                                   | +5.5 and +8.3 ‰                  |
| $\text{S}^0$ from sulfur granules within <i>Thiovulum</i> microorganisms            | +4.2 ‰                           |
| $\text{SO}_4^{2-}$ from the gypsum crystals covering the cave walls above the lake. | +1.1 to + 7.3 ‰                  |

332

333 The sulfur stable isotope ratios of the  $\text{H}_2\text{S}$  from the groundwater in Movile Cave ranged  
334 between  $\delta^{34}\text{S} = +5.5$  and  $+8.3 \text{ ‰}$ , and were close to the values measured for the oxidized sulfur  
335 in the gypsum crystals covering the cave walls above the lake:  $\delta^{34}\text{S} = +1.1$  to  $+ 7.3 \text{ ‰}$  (Table  
336 2). The sulfur granules from within *Thiovulum* in the cave lake had a  $\delta^{34}\text{S}$  value of  $+5.5 \text{ ‰}$ ,  
337 which is similar to the  $\delta^{34}\text{S}$  measured for the sulfide in the water and the sulfate (gypsum) in  
338 the cave walls. No significant isotopic fractionation appears therefore to take place during the  
339 oxidation of  $\text{HS}^-$  to  $\text{S}^0$ .

340

## 341 *Phylogenetic identification*

342 Following quality control and trimming of the 16S rRNA amplicon library, *ca.* 4700 read pairs  
343 could be merged into 400 bp long sequences. Of these, 35 % were annotated as *Thiovulum*. The  
344 latter, together with other *Thiovulum* sequences, formed a cluster distinct from the  
345 phylogenetically close genus *Sulfurimonas* (Fig. 4A). All Movile Cave *Thiovulum* sequences  
346 form one cluster separated into three main subclusters, one of which harbor also the three  
347 genomic 16S rRNA sequences. Only one of the three clusters harbors previously known  
348 sequences of *Thiovulum*, some of which (DQ295692, FJ165502, KM410698, EF467575) were  
349 obtained from sulfidic caves. The 16S rRNA gene of the *Thiovulum* ES (accession number  
350 AH003133.2) was removed from the analysis as the sequence contained long stretches of Ns.  
351 However, when used, this sequence does not fall within the Movile Cave clusters.

352 The circular, closed contig obtained from the metagenomic assembly of samples from Movile  
353 Cave was taxonomically classified with the GTDB-Tk software against the GTDB-Tk database  
354 (Chaumeil *et al.*, 2019). The genome was confirmed as *Thiovulum* sp. by having 76.34 % amino  
355 acid identity to the single other available *Thiovulum* genome obtained from Elkhorn Slough  
356 (ES), California (*Thiovulum* ES) (Marshall *et al.*, 2012). Accordingly, a phylogenetic tree  
357 constructed from a multilocus alignment of single-copy marker genes from, *Thiovulum* ES  
358 (Marshall *et al.*, 2012), the *Thiovulum* genome from Movile Cave and all available  
359 *Sulfurimonas* genomes resulted as well in the two *Thiovulum* genomes clustering together (Fig.  
360 4B).

361 To assess the abundance of *Thiovulum* in the different environments of the cave, phyloFlash  
362 (Gruber-Vodicka *et al.*, 2020) was used to identify and annotate 16S rRNA reads from the raw  
363 metagenomic data. *Thiovulum* was found in highest abundance (sequence frequency) in Air Bell  
364 2 (35 %), followed by the Lake Room (5 %) and submerged microbial mats (0.9 %) (see pie  
365 charts in Fig. 1).

## 366 *Genome analysis*

367 The assembly of metagenomic data from Movile Cave resulted in a closed circular genomic  
368 sequence classified as *Thiovulum* sp. The genome length is 1.72 Mbp with a GC content of  
369 28.4 %. Genome completeness was estimated using CheckM (Parks *et al.*, 2015) at 93 %. In  
370 absence of sufficient reference genomes for this genus, this value likely represents the full set  
371 of marker genes for *Thiovulum*. CheckM estimated a contamination of 0 % and a strain  
372 heterogeneity of 0: therefore, the *Thiovulum* genome assembly does not seem to contain any  
373 sequences from additional distant or closely related organisms. According to the annotation on  
374 the PATRIC server (Brettin *et al.*, 2015; Davis *et al.*, 2020), this genome contains 1849 coding  
375 sequences, of which 974 encode proteins of known function, 875 are hypothetical proteins, 35  
376 are tRNAs and 4 are CRISPR array comprising a total of 87 repeats. Subsystem hierarchical  
377 annotation shows that among the genes attributed to a Subsystem the largest subsystems were  
378 cofactors and vitamins, protein metabolism, and amino acids and derivatives (Fig. 5A). The  
379 same annotation conducted de-novo on the *Thiovulum* ES genomes suggests that the Movile  
380 and ES strains share a core of 493 Subsystem functions and have 36 and 48 additional unique  
381 Subsystem functions, respectively (Fig. 5B and Supplementary Data 1). Despite this large  
382 functional similarity between the two genomes, the two genomes turned out to be highly  
383 divergent according to their level of sequence similarity with clusters of orthologous genes  
384 (COGs; Fig. 5B and Supplementary Data 1).

385

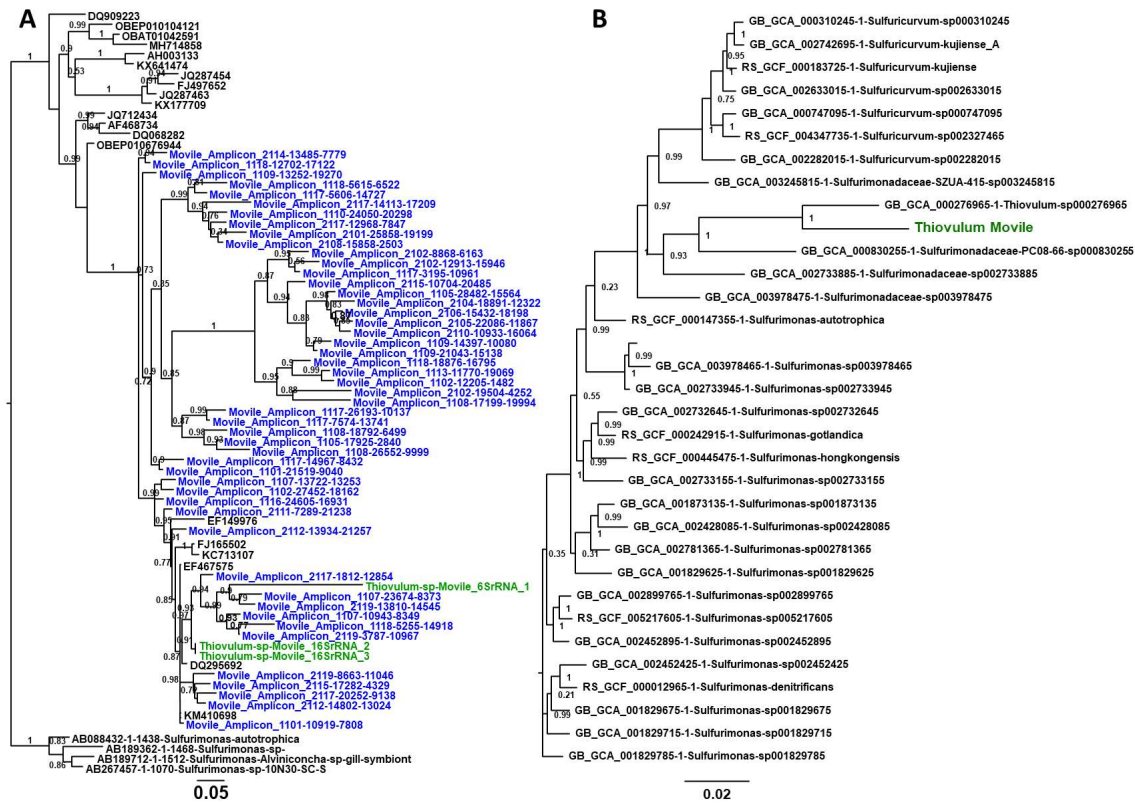

386

387 **Figure 4.** Phylogenetic placement of the 16S rRNA gene of *Thiovulum* from Movile Cave (A)  
 388 and its genome (B). The Shimodaira-Hasegawa local support values (ranging from 0 to 1)  
 389 are shown next to each node.

390

391 Carbon fixation likely takes place via the reductive TCA cycle, similarly to *Thiovulum* ES. For  
 392 both strains not all necessary genes for the rTCA cycle could be recognized by any single  
 393 annotation method including EggNOG 5.0 (Huerta-Cepas *et al.*, 2019), KEGG (Kanehisa *et al.*,  
 394 2016), COG (Tatusov *et al.*, 2000) or Subsystems.

395 Both the KEGG and Subsystem annotations revealed only few genes involved in sulfur  
 396 metabolism, with sulfide:quinone oxidoreductase being responsible for the formation of sulfur  
 397 globules. Additionally, we identified in both *Thiovulum* strains the tetrathionate reductase  
 398 subunit A and thiosulfate/3-mercaptopyruvate sulfurtransferase genes potentially involved in  
 399 the formation of sulfite from tetrathionate via thiosulfate. COG annotation identified in both  
 400 Movile and ES strains the presence of the bacterial heterodisulfide reductase (*dsrC*) (Venceslau  
 401 *et al.*, 2014) alongside rhodanase sulfurtransferases, involved in the conversion of sulfide to  
 402 sulfite. Subsequently, the presence of the *tauE* sulfite exporter gene was identified as well in  
 403 both strains.

404 In addition to the membrane-bound nitrate reductases (Nar) found in *Thiovulum* ES, the Movile-  
 405 Cave *Thiovulum* possesses also periplasmatic nitrate reductases encoded by the *nap* genes.  
 406 Some of the genes involved in the synthesis of the formate-dependent nitrite reductase were  
 407 identified in *Thiovulum* ES. These are confirmed in the current genome and are supplemented  
 408 by precursor genes to the *nrfA* encoded cytochrome c-552 which reduced nitrite to ammonia.  
 409 Additionally, the gene for hydroxylamine dehydrogenase, which is often encountered in  
 410 genomes from *Campylobacterota* (Haase *et al.*, 2017), formerly referred to as  
 411 *Epsilonproteobacteria* (Waite *et al.*, 2019), was also identified.

412 As *Thiovulum* sp. is a highly motile bacterium, we inspected motility and chemotaxis genes.  
 413 All genes necessary for flagellar assembly were found, similarly to *Thiovulum* ES. The  
 414 chemotaxis genes *cheA*, *cheY*, *cheW*, *cheV* and *cheD* were identified as well alongside the *cetA*  
 415 and *cetB* energy taxis genes, the parallel to the *Escherichia coli* aerotaxis (*aer*) gene. The *cheX*  
 416 gene, which was not found in the genome of *Thiovulum* ES, was identified in the Movile Cave  
 417 *Thiovulum*. Gene *cheB* was reported missing in *Thiovulum* ES, was identified in the Movile  
 418 strain but also in *Thiovulum* ES upon COG reannotation. Additionally, 11 methyl-accepting  
 419 chemotaxis proteins were identified.

420 In addition to flagella genes, the *pilA*, *pilE*, *pilT*, *pilN*, *pulO*, *fimV* genes responsible for the  
 421 formation and retraction of type IV pili.

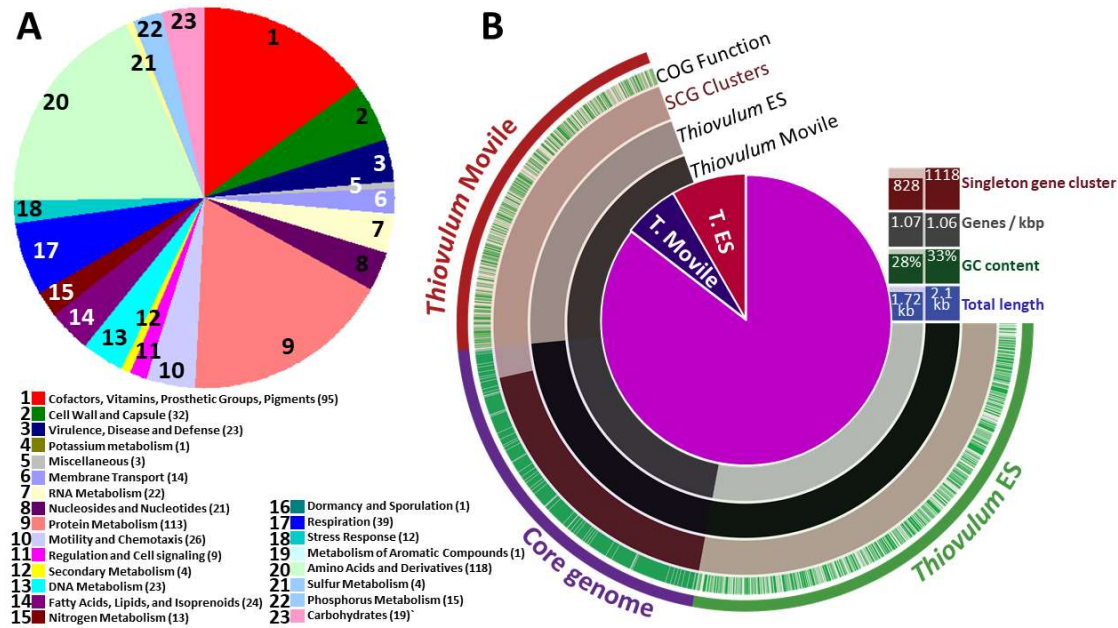

422

423 **Figure 5.** Distribution of genes of the Movile Cave *Thiovulum* associated with different  
 424 Subsystems (A) and functional comparison to the *Thiovulum* ES genome using Subsystems and  
 425 COG functional assignments (B) marking in both cases the core genome and the unique COGS  
 426 and Subsystems.

427

## 428 DISCUSSION

429 In Movile Cave, the oxidation of reduced compounds such as H<sub>2</sub>S, CH<sub>4</sub>, and NH<sub>4</sub><sup>+</sup> is the only  
 430 primary energy source. There, *Thiovulum* sp., a large sulfur oxidizer, often found in close  
 431 proximity to sediments, microbial mats or surfaces, is part of the chemoautotrophic microbial  
 432 community involved in *in situ* carbon fixation that represents the food base for the cave's  
 433 abundant and diverse invertebrate community. These *Thiovulum* cells, exceeding 15 μm in  
 434 diameter, are larger than most known sulfur-oxidizers: 5-10 μm (Fenchel, 1994) and 5 μm (Thar  
 435 and Fenchel, 2005) and, together with the larger *Thiomargarita namibiensis* (Schulz *et al.*,  
 436 1999) and *Achromatium oxaliferum* (Babenzien, 1991), belong to the group of giant sulfur  
 437 bacteria (Ionescu and Bizic, 2019). Here we investigated the morphological and genomic  
 438 aspects of what appears to be a fully planktonic *Thiovulum* sp. The new genome was compared  
 439 to the sole other existing genome of *Thiovulum*, strain ES. The latter, originating from a  
 440 phototrophic marine mat, was reannotated for the purpose of this comparison to account for  
 441 new available information, 8 years after its original publication.



## 442 Sulfide oxidation

443 *Thiovulum* (*Campylobacterota*; *Campylobacteria*; *Campylobacterales*; *Sulfurimonadaceae*)  
444 has been recognized to have several interesting features, including being among the fastest  
445 bacterial swimmers and its ability to form large veils consisting of interconnected cells. Many  
446 sulfur-oxidizing microorganisms including species of *Thiovulum* form veils by means of what  
447 appear to be mucous threads. These threads are used (Thar and Fenchel, 2001) by the cells to  
448 attach to solid surfaces (Fauré-Fremiet and Rouiller, 1958; De Boer *et al.*, 1961; Wirsén and  
449 Jannasch, 1978; Fenchel, 1994; Robertson *et al.*, 2006). In marine settings, such veils keep cells  
450 above sediments (Karavaiko *et al.*, 2006) at the oxic-anoxic interface where the optimal  
451 concentration of O<sub>2</sub> and H<sub>2</sub>S can be found (Pruesse *et al.*, 2012).

452 In Movile Cave, the dense agglomeration of cells does not form slime or strongly cohesive veils,  
453 but a loose cloud-like white veil close to the water surface. Nevertheless, SEM analyses shows  
454 that the cells are at least partially interconnected. It has been hypothesized that the coordinated  
455 movement of *Thiovulum* cells generates currents directing H<sub>2</sub>S or O<sub>2</sub> to the cells (Petroff and  
456 Libchaber, 2014). The fully planktonic localization of the cells in air bell 2 means that  
457 *Thiovulum* here cannot use surfaces to localize itself at the oxic anoxic interphase. Therefore,  
458 as sulfide concentration is high (245 μM) (Flot *et al.*, 2014), the cells likely need to coordinate  
459 their swimming to stay close to the surface where the O<sub>2</sub> necessary to their metabolism is present.

460 *Thiovulum* is a sulfide oxidizer as evidenced by its generation and accumulation of sulfur  
461 inclusions. Inclusions such as amorphous sulfur, polysulfide granules or orthorhombic sulfur  
462 inclusions have been described from other environments (Jørgensen and Revsbech, 1983;  
463 Robertson *et al.*, 2006). The amount and type of sulfur inclusions in cells is influenced by the  
464 concentrations of H<sub>2</sub>S and O<sub>2</sub> in the environment. Typically, cells store elemental sulfur when  
465 H<sub>2</sub>S is abundant in the environment, and later use the intracellular reserves of sulfur when the  
466 sulfide source in the environment is depleted (De Boer *et al.*, 1961). Sulfur inclusions were also  
467 shown to form when the supply of O<sub>2</sub> is limited and as a result the sulfur cannot be entirely  
468 oxidized to soluble sulfite, thiosulfate, or sulfate. Complete depletion of sulfur inclusions from  
469 cells is not likely in Movile Cave where abundant H<sub>2</sub>S is available continuously and where O<sub>2</sub>  
470 is scarce in most habitats (Sarbu *et al.*, 1996). Furthermore, while genomic analysis of the  
471 Movile Cave and ES strains identified the SQR gene involved in this process, the genes required  
472 for further oxidizing the elemental sulfur to sulfate are not present.

473 Marshall *et al.*, (2012) proposed the *Thiovulum* needs to undergo frequent (daily) oxic/anoxic  
474 cycles to prevent continuous accumulation of elemental sulfur in the cell. We advance two  
475 additional options by which the Movile Cave *Thiovulum* and likely the entire genus may evade  
476 sulfur globule intoxication. First, the identification of a the C subunit of dissimilatory sulfite  
477 reductase (*dsrC*) (Venceslau *et al.*, 2014) and rhodanese genes, known to be involved in S<sup>0</sup>  
478 conversion to sulfite (Poser *et al.*, 2014), and a sulfite exporter (*tauE*), suggest *Thiovulum* may  
479 be able oxidize elemental sulfur to sulfite and transport the latter out of the cell. Second, we  
480 propose that *Thiovulum* is capable of dissimilatory nitrate reduction to ammonia (DNRA) using  
481 elemental sulfur (Slobodkina *et al.*, 2017), a process already shown in *Campylobacterota* (e.g.  
482 *Sulfurospirillum deleyianum*) (Eisenmann *et al.*, 1995). The Movile Cave *Thiovulum* contains  
483 not only the *nar* (*narGH*) genes for nitrate reduction but also the periplasmic *nap* genes known  
484 for their higher affinity and ability to function in low nitrate concentrations (Pandey *et al.*, 2020).  
485 Additionally, we were able to identify the membrane component of the formate-dependent  
486 nitrite reductase, (*nrfD*) gene in both Movile and ES strains, as well as the formate-dependent  
487 periplasmic cytochrome C nitrite reductase, (subunit C-552) and the ferredoxin subunit of  
488 nitrite reductase in the Movile Cave strain. Last, the gene for hydroxylamine dehydrogenase  
489 (*hao*) was also identified in the Movile Cave *Thiovulum*. Hydroxylamine dehydrogenase is

490 known from other *Campylobacterota* (e.g. *Campylobacter fetus* or *Nautilia profundicola*) and  
491 was shown to mediate the respiratory reduction of nitrite to ammonia. In line with the findings  
492 of Marshall *et al.*, (2012), the *hao* gene was not found in the genome of *Thiovulum* ES upon re-  
493 annotation, suggesting that the *hao* gene may not be part of the core *Thiovulum* genome.  
494 Interestingly, normally *Campylobacterota* that utilize hydroxylamine dehydrogenase do not  
495 have the formate-dependent nitrite reductase. Similarly, *Campylobacterota*, typically use the  
496 periplasmic nitrate reductase (Nap) and do not have the membrane bound NarGHI system (Kern  
497 and Simon, 2009; Meyer and Huber, 2014). Interestingly, *Thiovulum* ES has only the Nar  
498 systems while the Movile Cave strain has both types. Nevertheless, while genomic information  
499 is suggestive of the presence or absence of specific enzymes and pathways, experiments or gene  
500 expression data are required to determine which of the genes are utilized and under which  
501 environmental conditions.

502

### 503 Carbon fixation

504 Marshall *et al.*, (2012) found all the genes necessary for the reverse TCA cycle to be present in  
505 *Thiovulum* ES, as is the case for the Movile Cave strain. However, while the isotopic  
506 fractionation of  $^{34}\text{S}/^{32}\text{S}$  between the sulfide in the water and the sulfur granules of the cells  
507 matches the literature (*ca.*  $2 \pm 2$  ‰, (Fry *et al.*, 1988), that of the  $^{13}\text{C}$  is lighter than expected  
508 from an organism utilizing the rTCA cycle (van der Meer *et al.*, 2001). Such depletion in  $^{13}\text{C}$  is  
509 rather typical of organisms utilizing the Calvin-Benson-Bassham (CBB) cycle (Pearson, 2010).  
510 Recently it was discovered that some *Campylobacterota* lost the genes needed for the TCA in  
511 favor of a gradual acquisition of those required for the CBB cycle (Assié *et al.*, 2020). Most of  
512 the genes involved in the CBB cycle are common in heterotrophs as well being part of  
513 alternative reactions. However, two enzymes are unique to the CBB cycle: phosphoribulokinase  
514 and ribulose 1,5-bisphosphate carboxylase/oxygenase (RuBisCO) (Hügler and Sievert, 2011).  
515 Thus, given that  $\delta^{13}\text{C}$  of cave dissolved inorganic carbon has been documented as low as -25 ‰  
516 (Knierim *et al.*, 2015), and some bacteria using rTCA have a fractionation of -15 to -35 ‰,  
517 relative to the dissolved inorganic carbon (Preuß *et al.*, 1989), it is likely that *Thiovulum* has a  
518 stronger preference towards the lighter carbon isotopes than other rTCA utilizers.

519

### 520 Cell motility and veil formation

521 The loose veil formation from Movile Cave appears to move slowly in various directions, most  
522 probably driven by slow movement of the individual cells toward zones of optimal chemical  
523 concentrations of  $\text{H}_2\text{S}$  and  $\text{O}_2$ . Similarly, Thar and Fenchel (2001 and 2005) showed that sulfur  
524 oxidizers move in nutrient and oxygen gradients and the dynamics and aggregation of cells is  
525 due to chemotactic properties toward a particular concentration of oxygen. Accordingly, genes  
526 involved in chemotaxis are abundant in the *Thiovulum* genome. Unlike the ES strain the Movile  
527 strain contains the CheX phosphatase rather than CheC, highlighting the high variability and  
528 diversity among bacterial chemotaxis systems (Wuichet and Zhulin, 2010; Bardy *et al.*, 2017).  
529 Methyl-accepting chemotaxis proteins (MCPs) are key elements in the bacterial chemotactic  
530 response to environmental signal (Salah Ud-Din and Roujeinikova, 2017). Motile bacteria carry  
531 between 3-30 (average 13) MCPs with *Campylobacterota* having *ca.* 10 (Lacal *et al.*, 2010).  
532 We identified 11 MCPs in the Movile Cave *Thiovulum* two of which matched known sequences  
533 while the other 9 were identified using secondary structure, adding to the already large known  
534 variability of these proteins.

535 *Thiovulum* sp. often forms large veils of interconnected cells. The threads connecting the cells  
536 are thought to be secreted by the antapical organelle, located at the posterior side of the cell (De

537 Boer *et al.*, 1961; Robertson *et al.*, 2015). Short peritrichous flagella-like fragments (Fig. 3D)  
538 observed on the surface of the cells resemble those noticed earlier in *Thiovulum* species (Wirsen  
539 and Jannasch, 1978). All genes necessary for type IV pili and flagella assembly were found in  
540 the Movile Cave and ES *Thiovulum* sp. (Marshall *et al.*, 2012). Accordingly, together with  
541 evaluating available electron microscopy we suggest that these ideas need be revisited.

542 First, our own SEM images (as well as previous ones of connected *Thiovulum* cells) show  
543 connecting threads that are not exclusively polar and are much thinner than the stalk like  
544 structure shown by de Boer *et al.*, (1961). We propose that these structures are rather type IV  
545 pili, which are known, among other functions, to connect cells to surfaces or other cells (Craig  
546 *et al.*, 2019). Alternatively, Bhattacharya *et al.*, (2019) have shown the formation of cell-  
547 connecting nanotubes constructed using the same enzymatic machinery used for flagella  
548 assembly. However, it is not possible to determine this in absence of TEM images of connected  
549 cells showing the presence of the reduced flagellar base Bhattacharya *et al.*, (2019).

550 Second, we question the flagellar nature of the peritrichous structures around the cells.  
551 Inspecting the high-resolution electron microscopy images taken by Faure-Fremie and Rouiller  
552 (1958), there is no single structure visible resembling a flagellar motor. Additionally, the length  
553 of these structures based on de Boer *et al.*, (1961) and a similar image in Robertson *et al.*, (2015)  
554 suggest that these <3  $\mu\text{m}$  structures are too short for typical flagella (> 10  $\mu\text{m}$  in length (e.g.  
555 (Renault *et al.*, 2017)) and are closer to the 1-2  $\mu\text{m}$  lengths known type for pili. Interestingly,  
556 *Caulobacter crescentus* swims at speeds of up to 100  $\mu\text{m s}^{-1}$  using a single flagellum aided by  
557 multiple pili (Gao *et al.*, 2014). In light of this hypothesis, we inspected the images of the  
558 fibrillar organelle at the antapical pole of the cells. The high-resolution images presented in  
559 Fauré-Fremiet and Rouiller (1958) and in de Boer (1961) show an area of densely packed  
560 fibrillar structures. Considering our current knowledge in flagellar motor size (*ca.* 20 nm) it is  
561 highly unlikely that each of these fibers is an individual flagellum, thus, potentially representing  
562 a new flagellar organization. Petroff *et al.*, (2015) investigated the physics behind the 2-  
563 dimensional plane assembly of *Thiovulum* veils and suggested it to be a direct result from the  
564 rotational movement which attracts cells to each other. Nevertheless, as seen, SEM images show  
565 cells are physically attached one to the other suggesting several mechanisms and steps may be  
566 involved. Interestingly, type IV pili retraction can generate forces up to 150 pN which are  
567 known to be involved in twitching motility in bacteria (Craig *et al.*, 2019). If coordinated, these  
568 may be part of the answer to the unexplained swimming velocity of *Thiovulum* (Garcia-Pichel,  
569 1989), which is, at *ca.* 615  $\mu\text{m s}^{-1}$ , 5 to 10 times higher than that of other flagellated bacteria.  
570 Thus, genomic information and re-evaluation of electron microscopy data raise new questions  
571 concerning the nature of the extracellular structures on the surface of *Thiovulum* sp. and call for  
572 new targeted investigations into this topic.

573

## 574 CONCLUSIONS

575 Movile Cave is a system entirely depending on chemosynthesis. We showed that submerged  
576 near-surface, planktonic microbial accumulations are dominated by *Thiovulum*, a giant  
577 bacterium typically associated with photosynthetic microbial mats. The genome of this  
578 planktonic *Thiovulum* strain suggests that it can perform dissimilatory reduction of nitrate to  
579 ammonium. As this may be a main mechanism in preventing continuous accumulation of sulfur  
580 globules in the cells, *Thiovulum* likely plays a major role in the nitrogen cycle of the cave,  
581 providing readily available ammonia to the surrounding microorganisms. Kumaresan *et al.*,  
582 (2014), based as well on genetic evidence, suggest nitrogen fixation and deamination of  
583 methylamines as the source of ammonium in the cave. The coupling of DNRA to sulfide  
584 oxidation provides a direct and more productive source of ammonium. Our results show that

585 the Movile Cave strain is similar to other cave *Thiovulum* sp., suggesting that in those  
586 subterranean ecosystems *Thiovulum* may as well play a role in both N and S cycles.

587 This investigation of the genome, coupled with observations of current and previous  
588 microscopy images, question the number of flagella the cells has, bringing forth the possibility  
589 that the cell may make use of type IV pili for its rapid movement and cell-to-cell interactions.

590 The collective behavior of *Thiovulum* is still a puzzle and there may be more than one  
591 mechanism keeping the cells connected in clusters or in veils. Our SEM images suggest the  
592 cells are connected by thread-like structures. Petroff *et al.*, (2015) show, on another strain, there  
593 is no physical connection between the cells. They suggest that the swimming behavior of  
594 individual cells keeps the cells together. More research is therefore needed to understand if  
595 these different mechanisms are driven by strain variability, or by different environmental  
596 conditions.

597

## 598 ACKNOWLEDGEMENTS

599 The authors thank GESS team for logistics with sampling in the cave and Viorel Atudorei for  
600 his valuable help with the interpretation of the stable isotope data. We would also like to thank  
601 Pheobe Laaguiby at the University of Vermont for performing the outstanding Oxford Nanopore  
602 sequencing and Bo Barker Jørgensen, Emily Fleming, Carl Wirsen, and Tom Fenchel for their  
603 valuable suggestions that led to the improvement of the quality of this manuscript. We thank  
604 Luca Zoccarato for the help with genomic graphical representation. We would also like to thank  
605 the extreme microbiome project for providing the DNA extraction reagents and methods as well  
606 as Laura Gray and Mehdi Keddache at Illumina Corp for providing partial sequencing reagents  
607 through its partnership with extreme microbiome project. T. Brad was supported by a grant of  
608 Ministry of Research and Innovation, project number PN-III-P4-ID-PCCF-2016-0016  
609 (DARKFOOD), and by EEA Grants 2014-2021, under Project contract no. 4/2019  
610 (GROUNDWATERISK). J.W. Aerts acknowledges the support from a grant from the User  
611 Support Programme Space Research (grant ALW-GO/13-09) of the Netherlands Organization  
612 for Scientific Research (NWO). M. Bizic was additionally funded through the DFG Eigene  
613 Stelle project (BI 1987/2-1). The computational resources for the assembly of the *Thiovulum*  
614 genome were provided to J.-F. Flot by the Consortium des Équipements de Calcul Intensif  
615 (CÉCI) funded by the Fonds de la Recherche Scientifique de Belgique (F.R.S.-FNRS) under  
616 Grant No. 2.5020.11.

617

## 618 REFERENCES

619

620 Assié, A., Leisch, N., Meier, D. V, Gruber-Vodicka, H., Tegetmeyer, H.E.,  
621 Meyerdierks, A., *et al.* (2020) Horizontal acquisition of a patchwork Calvin cycle by symbiotic  
622 and free-living Campylobacterota (formerly Epsilonproteobacteria). *ISME J* 14: 104–122.

623 Aziz, R.K., Bartels, D., Best, A.A., DeJongh, M., Disz, T., Edwards, R.A., *et al.* (2008)  
624 The RAST Server: Rapid Annotations using Subsystems Technology. *BMC Genomics* 9: 75.

625 Babenzien, H.-D. (1991) *Achromatium oxaliferum* and its ecological niche. *Zentralbl*  
626 *Mikrobiol* 146: 41–49.

627 Bardy, S.L., Briegel, A., Rainville, S., and Krell, T. (2017) Recent advances and future  
628 prospects in bacterial and archaeal locomotion and signal transduction. *J Bacteriol* 199:  
629 e00203-17.



- 630 Bauermeister, J., Ramette, A., and Dattagupta, S. (2012) Repeatedly evolved host-  
631 specific ectosymbioses between sulfur-oxidizing bacteria and amphipods living in a cave  
632 ecosystem. *PLoS One* 7: e50254.
- 633 Bhattacharya, S., Baidya, A.K., Pal, R.R., Mamou, G., Gatt, Y.E., Margalit, H., *et al.*  
634 (2019) A ubiquitous platform for bacterial nanotube biogenesis. *Cell Rep* 27: 334-342.e10.
- 635 De Boer, W.E., La Rivière, J.W.M., and Houwink, A.L. (1961) Observations on the  
636 morphology of *Thiovulum majus* Hinze. *Antonie Van Leeuwenhoek* 27: 447-456.
- 637 Brad, T., Fišer, C., Flot, J.F., and Sarbu, S.M. (2015) *Niphargus dancaui* sp. nov.  
638 (Amphipoda, Niphargidae) - A new species thriving in sulfidic groundwaters in southeastern  
639 Romania. *Eur J Taxon* 2015: (164).
- 640 Brettin, T., Davis, J.J., Disz, T., Edwards, R.A., Gerdes, S., Olsen, G.J., *et al.* (2015)  
641 RASTtk: a modular and extensible implementation of the RAST algorithm for building custom  
642 annotation pipelines and annotating batches of genomes. *Sci Rep* 5: 8365.
- 643 Bushnell, B., Rood, J., and Singer, E. (2017) BBMerge – Accurate paired shotgun read  
644 merging via overlap. *PLoS One* 12: e0185056.
- 645 Caporaso, J.G., Lauber, C.L., Walters, W.A., Berg-Lyons, D., Lozupone, C.A.,  
646 Turnbaugh, P.J., *et al.* (2011) Global patterns of 16S rRNA diversity at a depth of millions of  
647 sequences per sample. *Proc Natl Acad Sci* 108: 4516 LP – 4522.
- 648 Chaumeil, P.-A., Mussig, A.J., Hugenholtz, P., and Parks, D.H. (2019) GTDB-Tk: a  
649 toolkit to classify genomes with the Genome Taxonomy Database. *Bioinformatics*.
- 650 Chen, Y., Wu, L., Boden, R., Hillebrand, A., Kumaresan, D., Moussard, H., *et al.* (2009)  
651 Life without light: microbial diversity and evidence of sulfur- and ammonium-based  
652 chemolithotrophy in Movile Cave. *ISME J* 3: 1093-1104.
- 653 Clark, S.C., Egan, R., Frazier, P.I., and Wang, Z. (2013) ALE: a generic assembly  
654 likelihood evaluation framework for assessing the accuracy of genome and metagenome  
655 assemblies. *Bioinformatics* 29: 435-443.
- 656 Craig, L., Forest, K.T., and Maier, B. (2019) Type IV pili: dynamics, biophysics and  
657 functional consequences. *Nat Rev Microbiol* 17: 429-440.
- 658 Davis, J.J., Wattam, A.R., Aziz, R.K., Brettin, T., Butler, R., Butler, R.M., *et al.* (2020)  
659 The PATRIC Bioinformatics Resource Center: expanding data and analysis capabilities.  
660 *Nucleic Acids Res* 48: D606-D612.
- 661 Eisenmann, E., Beuerle, J., Sulger, K., Kroneck, P.M.H., and Schumacher, W. (1995)  
662 Lithotrophic growth of *Sulfurospirillum deleyianum* with sulfide as electron donor coupled to  
663 respiratory reduction of nitrate to ammonia. *Arch Microbiol* 164: 180-185.
- 664 Engel, A.S. (2015) Bringing microbes into focus for speleology: an introduction. In  
665 Engel, A.S (ed), *Microbial Life of Cave Systems*. Berlin, München, Boston: De Gruyter, pp. 1-  
666 22.
- 667 Eren, A.M., Esen, Ö.C., Quince, C., Vineis, J.H., Morrison, H.G., Sogin, M.L., and  
668 Delmont, T.O. (2015) Anvi'o: an advanced analysis and visualization platform for 'omics data.  
669 *PeerJ* 3: e1319.
- 670 Fauré-Fremiet, E. and Rouiller, C. (1958) Étude au microscope électronique d'une  
671 bactérie sulfureuse, *Thiovulum majus* Hinze. *Exp Cell Res* 14: 29-46.

- 672 Fenchel, T. (1994) Motility and chemosensory behaviour of the sulphur bacterium  
673 *Thiovulum majus*. *Microbiology* 140: 3109–3116.
- 674 Flot, J.-F., Bauermeister, J., Brad, T., Hillebrand-Voiculescu, A., Sarbu, S.M., and  
675 Dattagupta, S. (2014) *Niphargus–Thiothrix* associations may be widespread in sulphidic  
676 groundwater ecosystems: evidence from southeastern Romania. *Mol Ecol* 23: 1405–1417.
- 677 Fry, B., Gest, H., and Hayes, J.M. (1988)  $^{34}\text{S}/^{32}\text{S}$  fractionation in sulfur cycles catalyzed  
678 by anaerobic bacteria. *Appl Environ Microbiol* 54: 250–256.
- 679 Ganzert, L., Schirmack, J., Alawi, M., Mangelsdorf, K., Sand, W., Hillebrand-  
680 Voiculescu, A., and Wagner, D. (2014) *Methanosarcina spelaei* sp. nov., a methanogenic  
681 archaeon isolated from a floating biofilm of a subsurface sulphurous lake. *Int J Syst Evol*  
682 *Microbiol* 64: 3478–3484.
- 683 Gao, Y., Neubauer, M., Yang, A., Johnson, N., Morse, M., Li, G., and Tang, J.X. (2014)  
684 Altered motility of *Caulobacter crescentus* in viscous and viscoelastic media. *BMC Microbiol*  
685 14: 322.
- 686 Garcia-Pichel, F. (1989) Rapid bacterial swimming measured in swarming cells of  
687 *Thiovulum majus*. *J Bacteriol* 171: 3560–3563.
- 688 Garrison, E. and Marth, G. (2012) Haplotype-based variant detection from short-read  
689 sequencing. *arXiv* 1207.3907.
- 690 Gertz, E.M., Yu, Y.-K., Agarwala, R., Schäffer, A.A., and Altschul, S.F. (2006)  
691 Composition-based statistics and translated nucleotide searches: improving the TBLASTN  
692 module of BLAST. *BMC Biol* 4: 41.
- 693 Gough, J., Karplus, K., Hughey, R., and Chothia, C. (2001) Assignment of homology  
694 to genome sequences using a library of hidden Markov models that represent all proteins of  
695 known structure. *J Mol Biol* 313: 903–919.
- 696 Gruber-Vodicka, H.R., Seah, B.K.B., and Pruesse, E. (2020) phyloFlash: Rapid small-  
697 subunit rRNA profiling and targeted assembly from metagenomes. *mSystems* 5: 521922.
- 698 Haase, D., Hermann, B., Einsle, O., and Simon, J. (2017) Epsilonproteobacterial  
699 hydroxylamine oxidoreductase ( $\epsilon\text{Hao}$ ): characterization of a “missing link” in the multihem  
700 cytochrome *c* family. *Mol Microbiol* 105: 127–138.
- 701 Hayat, M. (2001) Principles and techniques of electron microscopy: biological  
702 applications, 4th ed. London: Cambridge University Press.
- 703 Herlemann, D.P., Labrenz, M., Jürgens, K., Bertilsson, S., Waniek, J.J., and Andersson,  
704 A.F. (2011) Transitions in bacterial communities along the 2000 km salinity gradient of the  
705 Baltic Sea. *ISME J* 5: 1571–1579.
- 706 Huang, Y., Niu, B., Gao, Y., Fu, L., and Li, W. (2010) CD-HIT Suite: a web server for  
707 clustering and comparing biological sequences. *Bioinformatics* 26: 680–2.
- 708 Huerta-Cepas, J., Szklarczyk, D., Heller, D., Hernández-Plaza, A., Forslund, S.K.,  
709 Cook, H., *et al.* (2019) eggNOG 5.0: a hierarchical, functionally and phylogenetically annotated  
710 orthology resource based on 5090 organisms and 2502 viruses. *Nucleic Acids Res* 47: D309–  
711 D314.
- 712 Hügler, M. and Sievert, S.M. (2011) Beyond the Calvin cycle: Autotrophic carbon  
713 fixation in the ocean. *Ann Rev Mar Sci* 3: 261–289.

- 714 Hutchens, E., Radajewski, S., Dumont, M.G., McDonald, I.R., and Murrell, J.C. (2004)  
715 Analysis of methanotrophic bacteria in Movile Cave by stable isotope probing. *Environ*  
716 *Microbiol* 6: 111–120.
- 717 Ionescu, D. and Bizic, M. (2019) Giant bacteria. In *eLS*. Chichester, UK: John Wiley &  
718 Sons, Ltd, pp. 1–10.
- 719 Jorgensen, B.B. and Revsbech, N.P. (1983) Colorless sulfur bacteria, *Beggiatoa* spp.  
720 and *Thiovulum* spp., in O<sub>2</sub> and H<sub>2</sub>S microgradients. *Appl Environ Microbiol* 45: 1261–1270.
- 721 Kanehisa, M., Sato, Y., Kawashima, M., Furumichi, M., and Tanabe, M. (2016) KEGG  
722 as a reference resource for gene and protein annotation. *Nucleic Acids Res* 44: D457–D462.
- 723 Karavaiko, G.I., Dubinina, G., and Kondrat'eva, T. (2006) Lithotrophic microorganisms  
724 of the oxidative cycles of sulfur and Iron. *Mikrobiologiya* 75: 593–629.
- 725 Kern, M. and Simon, J. (2009) Electron transport chains and bioenergetics of respiratory  
726 nitrogen metabolism in *Wolinella succinogenes* and other Epsilonproteobacteria. *Biochim*  
727 *Biophys Acta - Bioenerg* 1787: 646–656.
- 728 Knierim, K.J., Pollock, E.D., Hays, P.D., and Khojasteh, J. (2015) Using stable isotopes  
729 of carbon to investigate the seasonal variation of carbon transfer in a northwestern Arkansas  
730 cave. *J Cave Karst Stud* 77: 12–27.
- 731 Kolmogorov, M., Yuan, J., Lin, Y., and Pevzner, P.A. (2019) Assembly of long, error-  
732 prone reads using repeat graphs. *Nat Biotechnol* 37: 540–546.
- 733 Kumaresan, D., Wischer, D., Stephenson, J., Hillebrand-Voiculescu, A., and Murrell,  
734 J.C. (2014) Microbiology of Movile Cave — a chemolithoautotrophic ecosystem.  
735 *Geomicrobiol J* 31: 186–193.
- 736 Lacal, J., García-Fontana, C., Muñoz-Martínez, F., Ramos, J.-L., and Krell, T. (2010)  
737 Sensing of environmental signals: classification of chemoreceptors according to the size of their  
738 ligand binding regions. *Environ Microbiol* 12: 2873–2884.
- 739 Lascu, C., Popa, R., and Sarbu, S.M. (1994) Le karst de Movile (Dobrogea de Sud). *Rev*  
740 *Roum Géogr* 38: 85–94.
- 741 Luo, J., Lyu, M., Chen, R., Zhang, X., Luo, H., and Yan, C. (2019) SLR: a scaffolding  
742 algorithm based on long reads and contig classification. *BMC Bioinformatics* 20: 539.
- 743 Marshall, I.P.G., Blainey, P.C., Spormann, A.M., and Quake, S.R. (2012) A single-cell  
744 genome for *Thiovulum* sp. *Appl Environ Microbiol* 78: 8555–8563.
- 745 van der Meer, M.T.J., Schouten, S., Rijpstra, W.I.C., Fuchs, G., and Sinninghe Damsté,  
746 J.S. (2001) Stable carbon isotope fractionations of the hyperthermophilic crenarchaeon  
747 *Metallosphaera sedula*. *FEMS Microbiol Lett* 196: 67–70.
- 748 Meyer, J.L. and Huber, J.A. (2014) Strain-level genomic variation in natural populations  
749 of *Lebetimonas* from an erupting deep-sea volcano. *ISME J* 8: 867–880.
- 750 Muyzer, G., Waal, E.C., and Uitterlinden, A.G. (1993) Profiling of complex microbial  
751 populations by denaturing gradient gel electrophoresis analysis of polymerase chain reaction-  
752 amplified genes coding for 16S rRNA. *Appl Environ Microbiol* 59: 695–700.
- 753 Overbeek, R., Olson, R., Pusch, G.D., Olsen, G.J., Davis, J.J., Disz, T., *et al.* (2014) The  
754 SEED and the Rapid Annotation of microbial genomes using Subsystems Technology (RAST).  
755 *Nucleic Acids Res* 42: D206–D214.

- 756 Pandey, C.B., Kumar, U., Kaviraj, M., Minick, K.J., Mishra, A.K., and Singh, J.S.  
757 (2020) DNRA: A short-circuit in biological N-cycling to conserve nitrogen in terrestrial  
758 ecosystems. *Sci Total Environ* 738: 139710.
- 759 Parks, D.H., Imelfort, M., Skennerton, C.T., Hugenholtz, P., and Tyson, G.W. (2015)  
760 CheckM: assessing the quality of microbial genomes recovered from isolates, single cells, and  
761 metagenomes. *Genome Res* 25: 1043–1055.
- 762 Pearson, A. (2010) Pathways of carbon assimilation and their impact on organic matter  
763 values  $\delta^{13}\text{C}$ . In Timmis, K.N., *Handbook of Hydrocarbon and Lipid Microbiology.*, pp. 143–  
764 156.
- 765 Petroff, A. and Libchaber, A. (2014) Hydrodynamics and collective behavior of the  
766 tethered bacterium *Thiovulum majus*. *Proc Natl Acad Sci U S A* 111: E537 LP-E545.
- 767 Petroff, A.P., Wu, X.-L., and Libchaber, A. (2015) Fast-moving bacteria self-organize  
768 into active two-dimensional crystals of rotating cells. *Phys Rev Lett* 114: 158102.
- 769 Poser, A., Vogt, C., Knöller, K., Ahlheim, J., Weiss, H., Kleinstüber, S., and Richnow,  
770 H.H. (2014) Stable sulfur and oxygen isotope fractionation of anoxic sulfide oxidation by two  
771 different enzymatic pathways. *Environ Sci Technol* 48: 9094–9102.
- 772 Preuß, A., Schauder, R., Fuchs, G., and Stichler, W. (1989) Carbon isotope fractionation  
773 by autotrophic bacteria with three different CO<sub>2</sub> fixation pathways. *Zeitschrift für Naturforsch*  
774 *- Sect C J Biosci* 44: 397–402.
- 775 Price, M.N., Dehal, P.S., and Arkin, A.P. (2010) FastTree 2 – Approximately  
776 maximum-likelihood trees for large alignments. *PLoS One* 5: e9490.
- 777 Pruesse, E., Peplies, J., and Glöckner, F.O. (2012) SINA: Accurate high-throughput  
778 multiple sequence alignment of ribosomal RNA genes. *Bioinformatics* 28: 1823–1829.
- 779 Quast, C., Pruesse, E., Yilmaz, P., Gerken, J., Schweer, T., Yarza, P., *et al.* (2012) The  
780 SILVA ribosomal RNA gene database project: improved data processing and web-based tools.  
781 *Nucleic Acids Res* 41: D590–D596.
- 782 Renault, T.T., Abraham, A.O., Bergmiller, T., Paradis, G., Rainville, S., Charpentier,  
783 E., *et al.* (2017) Bacterial flagella grow through an injection-diffusion mechanism. *Elife* 6:  
784 e23136.
- 785 Riess, W., Giere, O., Kohls, O., and Sarbu, S. (1999) Anoxic thermomineral cave waters  
786 and bacterial mats as habitat for freshwater nematodes. *Aquat Microb Ecol* 18: 157–164.
- 787 Robertson, L.A., Gijs Kuenen, J., Paster, B.J., Dewhirst, F.E., and Vandamme, P. (2015)  
788 *Thiovulum*. In Trujillo, M.E., Dedysh, S., DeVos, P., Hedlund, B., Kämpfer, P., Rainey, F.A.,  
789 and Whitman, W.B. (eds), *Bergey's Manual of Systematics of Archaea and Bacteria*. Wiley,  
790 pp. 1–4.
- 791 Robertson, L.A., Kuenen, J.G., Paster, B.J., Dewhirst, F.E., and Vandamme, P. (2006)  
792 *Thiovulum* Hinze 1913, 195AL. In Brenner, D.J., Krieg, N.R., Staley, J.T., and Garrity, G.M.  
793 (eds), *Bergey's Manual® of Systematic Bacteriology*. New York: Springer, pp. 1189–1191.
- 794 Rohwerder, T., Sand, W., and Lascu, C. (2003) Preliminary evidence for a sulphur cycle  
795 in Movile Cave, Romania. *Acta Biotechnol* 23: 101–107.
- 796 Salah Ud-Din, A.I.M. and Roujeinikova, A. (2017) Methyl-accepting chemotaxis  
797 proteins: a core sensing element in prokaryotes and archaea. *Cell Mol Life Sci* 74: 3293–3303.



- 798 Sarbu, S.M. (2000) Movile Cave: A chemoautotrophically based groundwater  
799 ecosystem. In Wilken, H., Culver, D.C., and Humphreys, W.F. (eds), *Subterranean Ecosystems*.  
800 Amsterdam: Elsevier, pp. 319–343.
- 801 Sarbu, S.M. and Kane, T.C. (1995) A subterranean chemoautotrophically based  
802 ecosystem. *NSS Bull* 57: 91–98.
- 803 Sarbu, S.M., Kane, T.C., and Kinkle, B.K. (1996) A chemoautotrophically based cave  
804 ecosystem. *Science* 272: 1953–1955.
- 805 Sarbu, S.M. and Lascu, C. (1997) Condensation corrosion in Movile cave, Romania. *J*  
806 *Cave Karst Stud* 59: 99–102.
- 807 Sarbu, S.M., Lascu, C., and Brad, T. (2019) Dobrogea: Movile Cave. In Ponta, G.M.,  
808 and Onac, B.P. (eds), *Cave and karst systems of Romania*. Springer International Publishing,  
809 pp. 429–436.
- 810 Sarbu, S.M. and Popa, R. (1992) A unique chemoautotrophically based cave ecosystem.  
811 In Camacho, A.I. (ed), *The natural history of biospeleology*. Madrid: Mus. Nat. de Hist.  
812 Naturales, pp. 637–666.
- 813 Schirmack, J., Mangelsdorf, K., Ganzert, L., Sand, W., Hillebrand-Voiculescu, A., and  
814 Wagner, D. (2014) *Methanobacterium movilense* sp. nov., a hydrogenotrophic, secondary-  
815 alcohol-utilizing methanogen from the anoxic sediment of a subsurface lake. *Int J Syst Evol*  
816 *Microbiol* 64: 522–527.
- 817 Schulz, H.N., Brinkhoff, T., Ferdelman, T.G., Hernández Mariné, M., Teske, A., and  
818 Jørgensen, B.B. (1999) Dense populations of a giant sulfur bacterium in Namibian shelf  
819 sediments. *Science* 284: 493–495.
- 820 Seemann, T. (2014) Prokka: rapid prokaryotic genome annotation. *Bioinformatics* 30:  
821 2068–2069.
- 822 Slobodkina, G.B., Mardanov, A. V, Ravin, N. V, Frolova, A.A., Chernyh, N.A., Bonch-  
823 Osmolovskaya, E.A., and Slobodkin, A.I. (2017) Respiratory ammonification of nitrate coupled  
824 to anaerobic oxidation of elemental sulfur in deep-sea autotrophic thermophilic bacteria. *Front*  
825 *Microbiol* 8: 87.
- 826 Stocchino, G.A., Sluys, R., Kawakatsu, M., Sarbu, S.M., and Manconi, R. (2017) A new  
827 species of freshwater flatworm (Platyhelminthes, Tricladida, Dendrocoelidae) inhabiting a  
828 chemoautotrophic groundwater ecosystem in Romania. *Eur J Taxon* 2017: 1–21.
- 829 Tatusov, R.L., Galperin, M.Y., Natale, D.A., and Koonin, E. V (2000) The COG  
830 database: a tool for genome-scale analysis of protein functions and evolution. *Nucleic Acids*  
831 *Res* 28: 33–36.
- 832 Thar, R. and Fenchel, T. (2005) Survey of motile microaerophilic bacterial morphotypes  
833 in the oxygen gradient above a marine sulfidic sediment. *Appl Environ Microbiol* 71: 3682–  
834 3691.
- 835 Thar, R. and Fenchel, T. (2001) True chemotaxis in oxygen gradients of the sulfur-  
836 oxidizing bacterium *Thiovulum majus*. *Appl Environ Microbiol* 67: 3299–3303.
- 837 Vaser, R., Sović, I., Nagarajan, N., and Šikić, M. (2017) Fast and accurate de novo  
838 genome assembly from long uncorrected reads. *Genome Res* 27: 737–746.
- 839 Venceslau, S.S., Stockdreher, Y., Dahl, C., and Pereira, I.A.C. (2014) The “bacterial  
840 heterodisulfide” DsrC is a key protein in dissimilatory sulfur metabolism. *Biochim Biophys*  
841 *Acta - Bioenerg* 1837: 1148–1164.

- 842           Waite, D.W., Chuvochina, M.S., and Hugenholtz, P. (2019) Road map of the phylum  
843 *Campylobacterota*. In Trujillo, M.E., Dedysh, S., DeVos, P., Hedlund, B., Kämpfer, P., Rainey,  
844 F.A., and Whitman, W.B. (eds) *Bergey's Manual of Systematics of Archaea and Bacteria*,  
845 *Major Reference Works*. pp. 1–11.
- 846           Walker, B.J., Abeel, T., Shea, T., Priest, M., Abouelliel, A., Sakthikumar, S., *et al.*  
847 (2014) Pilon: An integrated tool for comprehensive microbial variant detection and genome  
848 assembly improvement. *PLoS One* 9: e112963.
- 849           Wick, R.R., Judd, L.M., Gorrie, C.L., and Holt, K.E. (2017) Unicycler: Resolving  
850 bacterial genome assemblies from short and long sequencing reads. *PLoS Comput Biol* 13:  
851 e1005595.
- 852           Wick, R.R., Schultz, M.B., Zobel, J., and Holt, K.E. (2015) Bandage: interactive  
853 visualization of *de novo* genome assemblies. *Bioinformatics* 31: 3350–3352.
- 854           Wirsen, C.O. and Jannasch, H.W. (1978) Physiological and morphological observations  
855 on *Thiovulum* sp. *J Bacteriol* 136: 765–774.
- 856           Wuichet, K. and Zhulin, I.B. (2010) Origins and diversification of a complex signal  
857 transduction system in prokaryotes. *Sci Signal* 3: ra50 LP-ra50.
- 858
- 859

860 Supplementary material

861

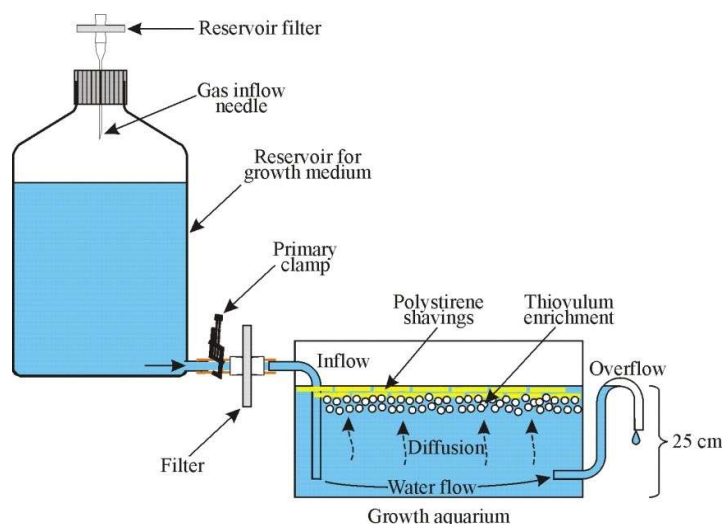

862

863

864 Fig. S1. Laboratory setup that produced an enrichment culture with high abundance of  
865 *Thiovulum* cells from Movile Cave. The water source contained a mineral growth solution and  
866 0.25 mM H<sub>2</sub>S at pH 7. A floating layer approximately 5-10 mm thick of polystyrene (each 1-3  
867 mm thin and 2-4 cm long) shavings was added to the water surface to maintain an anchoring  
868 substrate for the cells near the water surface and also to limit the diffusion of O<sub>2</sub> in the water.  
869 The setup was installed in a ventilated hood in the lab at 20 °C and the culture was established  
870 within two weeks. This setup produced abundant *Thiovulum* growth, but because of its design,  
871 it could not be sterilized and therefore did not allow producing a pure *Thiovulum* culture.
