1 **Cave *Thiovulaceae* differ metabolically and genomically from marine species**

2 Mina Bizic<sup>1,2,\*#</sup>, Traian Brad<sup>3,4,\*#</sup>, Danny Ionescu<sup>1,2,\*</sup>, Lucian Barbu-Tudoran<sup>5</sup>, Joost Aerts<sup>6</sup>, Radu  
3 Popa<sup>7</sup>, Luca Zoccarato<sup>1</sup>, Jessica Ody<sup>8</sup>, Jean-François Flot<sup>8,9</sup>, Scott Tighe<sup>10</sup>, Daniel Vellone<sup>10</sup>, and  
4 Serban M. Sarbu<sup>11, 12</sup>

5  
6 <sup>1</sup> Leibniz Institute for Freshwater Ecology and Inland Fisheries, IGB, Dep 3, Experimental Limnology,  
7 Zur Alte Fischerhütte 2, OT Neuglobsow, 16775 Stechlin, Germany

8 <sup>2</sup> Berlin-Brandenburg Institute of Advanced Biodiversity Research (BBIB), Berlin, Germany

9 <sup>3</sup> “Emil Racoviță” Institute of Speleology, Clinicilor 5-7, 400006 Cluj-Napoca Romania,

10 <sup>4</sup> Institutul Român de Știință și Tehnologie, Virgil Fulicea nr. 3, 400022 Cluj-Napoca, Romania

11 <sup>5</sup> Center for Electron Microscopy, “Babeș-Bolyai” University, Clinicilor 5, 400006 Cluj-Napoca,  
12 Romania

13 <sup>6</sup> Department of Molecular Cell Physiology, Faculty of Earth and Life sciences, De Boelelaan 1085,  
14 1081 HV Amsterdam, The Netherlands

15 <sup>7</sup> River Road Research, 62 Leslie St. Buffalo, NY 1421, USA

16 <sup>8</sup> Evolutionary Biology and Ecology, Université libre de Bruxelles (ULB), C.P. 160/12, Avenue F.D.  
17 Roosevelt 50, 1050 Brussels, Belgium

18 <sup>9</sup> Interuniversity Institute of Bioinformatics in Brussels – (IB)<sup>2</sup>, Brussels, Belgium

19 <sup>10</sup> Vermont Integrative Genomics Lab, University of Vermont Cancer Center, Health Science Research  
20 Facility, Burlington, Vermont, 05405, USA

21 <sup>11</sup> “Emil Racoviță” Institute of Speleology, Frumoasă 31-B, 010986 București, Romania

22 <sup>12</sup> Department of Biological Sciences, California State University, Chico 95929, USA

23  
24 \* Authors have contributed equally to the work

25  
26 # Corresponding authors

27 Mina Bizic: [mina.bizic@igb-berlin.de](mailto:mina.bizic@igb-berlin.de)

28 Traian Brad: [traian.brad@academia-cj.ro](mailto:traian.brad@academia-cj.ro)

29

30

31

32 ABSTRACT

33 Life in Movile Cave (Romania) relies entirely on carbon fixation by bacteria. The microbial community  
34 in the surface water of Movile Cave's hypoxic air bells is dominated by large spherical-ovoid bacteria  
35 we identified as *Thiovulum* sp. (*Campylobacterota*). These form a separate phylogenetic cluster within  
36 the *Thiovulaceae*, consisting mostly of freshwater cave bacteria. We compared the closed genome of  
37 this *Thiovulum* to that of the marine strain *Thiovulum* ES, and to a genome we assembled from public  
38 data from the sulfidic Frasassi caves. The Movile and Frasassi *Thiovulum* were very similar, differing  
39 greatly from the marine strain. Based on their genomes, cave *Thiovulum* can switch between aerobic  
40 and anaerobic sulfide oxidation using O<sub>2</sub> and NO<sub>3</sub><sup>-</sup> as electron acceptors, respectively. NO<sub>3</sub><sup>-</sup> is likely  
41 reduced to NH<sub>3</sub> via dissimilatory nitrate reduction to ammonia using periplasmic nitrate reductase (Nap)  
42 and hydroxylamine oxidoreductase. Thus, *Thiovulum*, is likely important to both S and N cycles in  
43 sulfidic subterranean aquatic ecosystems. Additionally, we suggest that the short peritrichous flagella-  
44 like structures typical of *Thiovulum* are type IV pili, for which genes were found in all *Thiovulum*  
45 genomes. These pili may play a role in veil formation, connecting adjacent cells and the exceptionally  
46 fast swimming of these bacteria.

47 Key words: *Thiovulum*, sulfur, DNRA, Movile Cave, sulfide-oxidation

48

49

50

## 51 INTRODUCTION

52 Movile Cave is located near the town of Mangalia, SE Romania (43°49'32"N, 28°33'38"E), 2.2 km  
53 inland from the Black Sea shore. It consists of a 200 m long upper dry passage that ends in a small lake  
54 allowing access to a 40 m long, partially submerged lower cave level (Fig. 1). Thick and impermeable  
55 layers of clays and loess cover the limestone in which the cave is developed, preventing input of water  
56 and nutrients from the surface (Lascu *et al.*, 1994). Sulfidic groundwater flows constantly at the bottom  
57 of Movile Cave's lower passages. Because of the morphology of the lower cave passages (Fig. 1) and a  
58 slight difference in water temperatures, the water near the surface is practically stagnant. Oxygen  
59 penetrates up to 1 mm of the water column, below which the water is anoxic (Riess *et al.*, 1999).

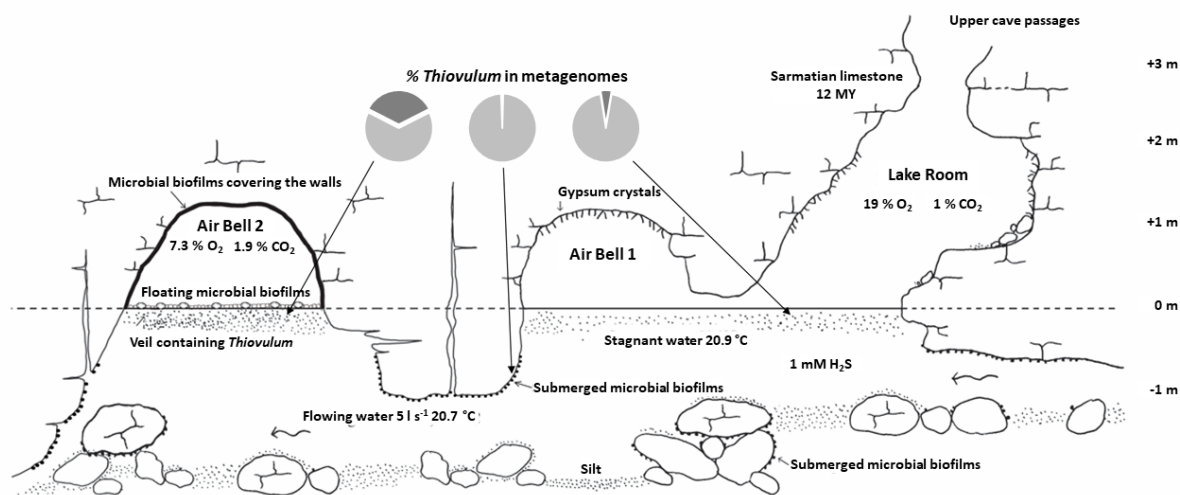

60  
61 **Figure 1.** Longitudinal profile of the sampling area in Movile Cave (modified after Sarbu and Popa,  
62 1992). The microbial community containing *Thiovulum* cells (depicted here as dots present beneath the  
63 water surface) was sampled in the Lake Room and in Air Bells 1 and 2. *Thiovulum* 16S rRNA made up  
64 5 %, 0.9 % and 35 % of the 16S rRNA genes retrieved from metagenomic samples (dark gray in pies)  
65 from these cave sections, respectively. More details on community composition are presented in  
66 Supplementary Figure 1.

67  
68 Cave ecosystems, normally characterized by stable conditions, provide a window into subsurface  
69 microbiology (Engel, 2015). In the absence of natural light, these ecosystems are typically fueled by  
70 chemolithoautotrophy via the oxidation of reduced compounds such as H<sub>2</sub>S, Fe<sup>2+</sup>, Mn<sup>2+</sup>, NH<sub>3</sub>, CH<sub>4</sub>, and  
71 H<sup>+</sup>. Most of the microbiological studies performed in Movile Cave (summarized in (Kumaresan *et al.*,  
72 2014) are based on samples of microbial biofilms floating on the water surface or covering rock surfaces  
73 in the cave's Air Bells (Fig. 1), where the atmosphere is low in O<sub>2</sub> (7-10 %) and enriched in CO<sub>2</sub> (2.5 %)  
74 and CH<sub>4</sub> (1-2 %) (Sarbu, 2000). There, chemoautotrophic microorganisms, living at the water surface,  
75 oxidize reduced chemical compounds such as H<sub>2</sub>S, CH<sub>4</sub> and NH<sub>4</sub><sup>+</sup> from the thermo-mineral groundwater  
76 (Sarbu, 2000; Sarbu and Kane, 1995; Sarbu *et al.*, 1996). *Thiobacillus*, *Thiothrix*, *Thioploca*, *Thiomonas*  
77 and *Sulfurospirillum* oxidize H<sub>2</sub>S using O<sub>2</sub> or NO<sub>3</sub><sup>-</sup> as electron acceptors (Rohwerder *et al.*, 2003; Chen  
78 *et al.*, 2009; Flot *et al.*, 2014). The methanotrophs *Methylomonas*, *Methylococcus* and *Methylocystis*  
79 (Hutchens *et al.*, 2004), *Methanobacterium* (Schirmack *et al.*, 2014) and *Methanosarcina* (Ganzert *et al.*,  
80 2014) are also found in the cave, alongside other methylothrophs such as *Methylotenera*,  
81 *Methylophilus* and *Methylovorus* (Rohwerder *et al.*, 2003; Chen *et al.*, 2009). Chen *et al.* (2009) further  
82 identified in this cave ammonia and nitrite oxidizers from the genera *Nitrospira* and *Nitrotoga*.

83 In the lower level of Movile Cave, directly below the water surface (not deeper than 2-3 mm) we  
84 observed a loose floating veil resembling a slow-moving white cloud (Fig. 2 and Supplementary video  
85 1). Using genetic and microscopic analysis, we concluded that this underwater agglomeration of bacteria  
86 is dominated by a species of the genus *Thiovulum* (Fig. 1, S1 and results).

87 *Thiovulum* is a large bacterium, typically < 25 µm in diameter (Robertson *et al.*, 2015) but can reach 45  
88 µm (Sylvestre *et al.*, 2021). It is a sulfur-oxidizing chemolithoautotrophic bacteria (Wirsen and Jannasch,  
89 1978) with an extremely fast motility (Garcia-Pichel, 1989; Thar and Fenchel, 2001). *Thiovulum* is  
90 known to form a veil close to surfaces (Petroff *et al.*, 2015; Robertson *et al.*, 2015), to which it can attach  
91 through a secreted stalk (De Boer *et al.*, 1961). It is normally located close to the oxic-anoxic interface  
92 near sediments or microbial mats (Marshall *et al.*, 2012; Robertson *et al.*, 2015; Jorgensen and Revsbech,  
93 1983) where the 2D organization of the veil and the rapid movements of the cells' flagella produce a  
94 convective transport of O<sub>2</sub> (Fenchel and Glud, 1998).

95 To the best of our knowledge, this is the first description of fully planktonic *Thiovulum* swarms/veils at  
96 distance from any solid surface. Here we provide further morphological and genomic information on  
97 this bacterium, offering new insights into its metabolic properties and raising novel questions.

98

## 99 MATERIALS AND METHODS

100 A detailed description of the methods is provided in the supplementary material.

101 Replicate samples of water were collected into sterile containers from the surface of the small sulfidic  
102 lake and from the Air Bells in the lower section of Movile Cave (Fig. 1). Unpreserved 50 ml water  
103 samples were immediately brought to the laboratory and inspected using optical microscopy. Samples  
104 for DNA/RNA analysis were preserved in ethanol (final concentration of 50 %). Additionally, samples  
105 were preserved with formaldehyde (final concentration of 4 %) for cell enumeration. Samples for  
106 electron microscopy were fixed with 2.7 % glutaraldehyde in phosphate buffered saline (1× PBS).  
107 Samples for DNA extraction were collected in July 2019 whereas samples for RNA extraction were  
108 collected in August 2021.

### 109 *Electron microscopy and elemental analysis*

110 Fixed, dehydrated, and epoxy-embedded samples were sliced (100 nm thickness), stained with lead  
111 citrate and uranyl acetate (Hayat, 2001) and analyzed with Jeol JEM transmission electron microscope  
112 (Jeol, Japan). Samples for scanning electron microscopy (SEM) were sputtered with gold and examined  
113 on a JEOL JSM 5510 LV microscope (Jeol, Japan). Energy-dispersive X-ray spectroscopy (EDX)  
114 analysis was performed with an EDX analyzer (Oxford Instruments, Abingdon, UK) and with the INCA  
115 300 software.

### 116 *DNA and RNA Extraction*

117 Genomic DNA was extracted using a modified version of the Omega BioTek Universal Metagenomics  
118 kit protocol (OMEGA Bio-Tek, GA, USA) (see supplementary material) from samples filtered on with  
119 a 0.2 µm Isopore membrane filter (Millipore Sigma, MA, USA).

120 For RNA extraction, total nucleic acids were extracted from polycarbonate filters (Millipore, 0.2 µm  
121 pore size) following Nercessian *et al.* (2005) with minor modifications (see supplementary material).  
122 DNA was digested by two sequential treatments with the TurboDNAfree Kit (Invitrogen ThermoFisher  
123 Scientific, Dreieich, Germany) following the manufacturer's instructions. DNA removal was evaluated  
124 using a PCR reaction for 16S rRNA gene. First strand cDNA was then generated using the High-  
125 Capacity cDNA Reverse Transcription Kit (Applied Biosciences, ThermoFisher scientific), and was sent  
126 for sequencing at the Core Genomic Facility at RUSH university, Chicago, IL, USA.

### 127 *16S rRNA gene amplicon sequencing and processing*

128 PCR reactions were performed in triplicates targeting the V3-V4 region of the 16S rRNA gene, using  
129 the V3 forward primer S-D-Bact-0341-b-S-17, 5'-CCTACGGGNGGCWGCAG-3 (Herlemann *et al.*,  
130 2011), and the V4 reverse primer S-D-Bact-0785-a-A-21, 5'-GACTACHVGGGTATCTAATCC-3  
131 (Muyzer *et al.*, 1993), resulting in fragments of ~430 bp. The primers were dual barcoded in a way  
132 compatible with Illumina sequencing platforms (as described in Caporaso *et al.* (2011)).

133 Composite samples were paired-end sequenced at the Vrije Universiteit Amsterdam Medical Center  
134 (Amsterdam, The Netherlands) on an Illumina MiSeq Sequencer. The paired sequences were  
135 dereplicated using the dedupe tool of the BBTools package ([sourceforge.net/projects/bbmap/](https://sourceforge.net/projects/bbmap/)) aligned

136 and annotated using the SINA aligner (Pruesse *et al.*, 2012) against the SILVA SSU database (v 138.1)  
137 (Quast *et al.*, 2013)

138 A maximum-likelihood phylogenetic tree was calculated including only long 16S rRNA sequences,  
139 using FastTree 2 (Price *et al.*, 2010) using all *Thiovulum* sequences in the SILVA database (n=71), three  
140 16S rRNA sequences obtained from the assembled genome of the Movile Cave *Thiovulum* (see below)  
141 and sequences of different *Sulfurimonas* species as an outgroup. A second tree included amplicon  
142 sequences as well. For the sake of legibility, the 908 *Thiovulum* sequence variants obtained were  
143 clustered at 97 % similarity using CD-HIT-EST (Huang *et al.*, 2010), resulting in 50 clusters.

144 To obtain information on relative *Thiovulum* abundance, the raw short-read libraries (metagenomic)  
145 were analyzed with phyloFlash (V 3.3; (Gruber-Vodicka *et al.*, 2020)).

#### 146 Shotgun sequencing (Illumina and Oxford Nanopore)

147 Shotgun sequencing was accomplished using both Illumina and Oxford Nanopore sequencing  
148 technologies. For Illumina sequencing, 1 ng of genomic DNA from each sample was converted to whole-  
149 genome sequencing libraries using the Nextera XT sequencing reagents according to the manufacturer's  
150 instructions (Illumina, San Deigo CA).

151 A first pass of Oxford Nanopore sequences was obtained using the SQK LSK109 ligation library  
152 synthesis reagents on a Rev 9.4 nanopore flow cell with the GridION X5 MK1 sequencing platform,  
153 resulting in a total of 131.8 Mbp of reads with a N50 of 1.3 kbp.

154 Additionally, sequencing was performed on several cellular aggregates that were confirmed  
155 microscopically to contain *Thiovulum* cells. The cell aggregates were lysed by freeze thawing and further,  
156 following the manufacturer's instructions, as part of the DNA amplification process using the Repli-G  
157 single cell amplification kit (Qiagene, Hilden, Germany). Libraries for Nanopore sequencing were  
158 prepared using the LSK-108 kit following the manufacturer's protocol but skipping the size selection  
159 step. The prepared libraries were loaded on MIN106 R9 flow cells, generating a total of 5.7 Gbp of reads  
160 with a length N50 of about 3.7 kbp. Basecalling for all Oxford Nanopore reads were done using Guppy  
161 4.0.11.

#### 162 cDNA sequencing

163 cDNA was sheared with the Rapid Shear gDNA shearing kit (Triangle Biotechnology, Durham, NC,  
164 USA) and used in the Swift 1S protocol (Accel-NGS 1S Plus kit, Swift Biosciences, Ann Arbor, Mi,  
165 USA) with 6 cycles of PCR during indexing. Following library prep, all libraries were pooled in equal  
166 volume by combining 2 µl of each library for a final bead clean up with 0.85X AmpPure beads (Beck-  
167 man Coulter Life Sciences, Indianapolis, IN, USA). This QC pool was then sequenced on an Illumina  
168 MiniSeq MO flow cell. The resulting index distribution was used to re-pool the libraries for an Illumina  
169 SP flow cell sequencing run with sample LR1 pooled at maximum volume available.

170 All sequencing data generated in this study were deposited in NCBI Sequence Read Archive under  
171 accession number PRJNA673084.

172

#### 173 Metagenomic data analysis

174 Nanopore reads were assembled using Flye 2.8.1-b1676 (Kolmogorov *et al.*, 2019) with default  
175 parameters, further manually processed using Bandage (Wick *et al.*, 2015) following a final polishing  
176 step was performed with unicycler-polish from Unicycler v0.4.9b (Wick *et al.*, 2017) using the complete  
177 set of Illumina reads (for a total depth of coverage of 12X of the genome) and the subset of Nanopore  
178 reads longer than 5 kb (ca. 50X). Polishing consisted of two cycles of pilon 1.23 (Walker *et al.*, 2014),  
179 one cycle of racon 0.5.0 (Vaser *et al.*, 2017) followed by FreeBase (Garrison and Marth, 2012), then 30  
180 additional cycles of short-read polishing using pilon 1.23, after which the assembly reached its best ALE  
181 score (Clark *et al.*, 2013).

182 The completeness of the *Thiovulum* genome obtained was assessed using CheckM (Parks *et al.*, 2015)  
183 and its continuity using the unicycler-check module in Unicycler v0.4.9b. Annotation was performed  
184 using Prokka (Seemann, 2014), DRAM (Shaffer *et al.*, 2020), KEGG (Kanehisa *et al.*, 2016), EggNOG



185 5.0 (Huerta-Cepas *et al.*, 2019), PATRIC (Davis *et al.*, 2020; Brettin *et al.*, 2015) and RAST (Aziz *et al.*,  
186 2008; Overbeek *et al.*, 2014). A COG (Tatusov *et al.*, 2000) analysis was done using the ANVIO tool  
187 (Eren *et al.*, 2015). OperonMapper (Taboada *et al.*, 2018) was used to inspect the organization of genes  
188 into operons. CRISPRs were identified using CRISPR finder tool (Grissa *et al.*, 2007). Metabolic  
189 models of the annotated genome from Movile Cave and that of *Thiovulum* ES were calculated using  
190 PathwayTools (V25.3) (Karp *et al.*, 2021).

191

#### 192 *Thiovulum* sp. genome assembly from public databases

193 All available metagenomic libraries from the Frasassi caves in Italy (accession numbers in  
194 supplementary material) were quality-trimmed using Trimmomatic (Bolger *et al.*, 2014) and scanned  
195 for the presence of *Thiovulum* 16S rRNA using PhyloFlash (Gruber-Vodicka *et al.*, 2020). Library  
196 SRR1560850 contained >170,000 *Thiovulum* sp. 16S rRNA and was assembled using Megahit V. 1.2.9  
197 (Li *et al.*, 2015), and binned using Metabat2 (Kang *et al.*, 2015). The bins were taxonomically annotated  
198 using the GTDB-Tk tool (Chaumeil *et al.*, 2019) with one bin annotated as *Thiovulum*. The phylogenetic  
199 tree generated by the GTDB-Tk tool from a single-copy marker gene multilocus alignment suggested  
200 that the Movile and Frasassi caves *Thiovulum* genomes were closely related, hence, both genomes were  
201 used to recruit all *Thiovulum* related reads from all Frasassi libraries. The obtained reads were re-  
202 assembled, binned and taxonomically annotated, as above, resulting in a *Thiovulum* bin with 94 %  
203 completeness, 0.41 % contamination and 25 % strain heterogeneity as evaluated using CheckM (Parks  
204 *et al.*, 2015).

205

#### 206 Transcriptomic analysis

207 The 6 libraries containing cDNA sequences (3 from Air Bell 2 and 3 from Lake Room), were quality-  
208 trimmed using trimomatic (Bolger *et al.*, 2014) and mapped against the complete genome of the  
209 Movile cave *Thiovulum* sp. using Salmon version 1.6 (Patro *et al.*, 2017). Ribosomal RNA data were  
210 removed from the mapping results and TPM (Transcripts Per Kilobase Million) values were recalculated  
211 to reflect mRNA expression. The RNA data was analyzed using the iDEP (v. 0.95) online tool (Ge *et al.*,  
212 2018) that provides an online graphical user interface for the DeSEQ2 (Love *et al.*, 2014) and Limma  
213 (Ritchie *et al.*, 2015) packages for RNAseq analysis. Differential expression was considered significant  
214 with a 2-fold difference and a false discovery rate smaller than 0.1. Taxonomic composition of the active  
215 community was obtained by analyzing the 16S rRNA gene from the transcriptomic read libraries using  
216 PhyloFlash as above (V 3.3; (Gruber-Vodicka *et al.*, 2020)). Viral transcripts were identified using  
217 VirSorter2 (v.1.1) (Guo *et al.*, 2021), annotated against the viral refseq database release 209 using  
218 BLAST and quantified using Salmon version 1.6 (Patro *et al.*, 2017).

219

## 220 RESULTS

### 221 Field observations

222 A pale-white veil, with a vertical thickness of 2 to 3 mm, was observed below and adjacent to the water  
223 surface in Movile Cave (Fig. 2), resembling microbial veils described for sulfur-oxidizing bacteria  
224 (Fenchel, 1994; Garcia-Pichel, 1989). Nevertheless, in Movile Cave, the dense agglomeration of cells  
225 does not form slime or a strongly cohesive aggregation.

226

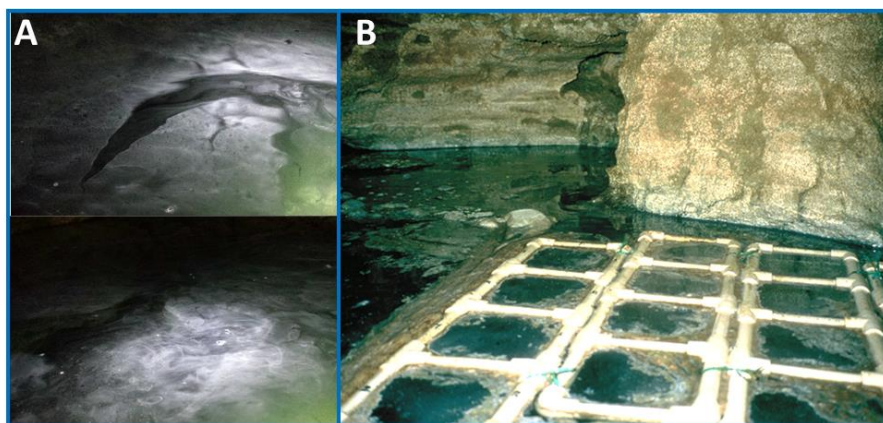

227

228 **Figure 2.** Images of subsurface veil from the Lake Room (A) and Air Bell 2 (B) in Movile Cave. See  
229 also Supplementary Video 1.

### 230 Microscopy

231 Veils similar to those seen in the Lake Room (Fig. 2A) were also observed in Air Bell 1 and even more  
232 so in Air Bell 2 (Fig 2B) where they reached the highest densities. In Air Bell 2 these veils consisted of  
233 large, spherical to ovoid, bacterial cells (Fig. 3A-B) identified as belonging to the genus *Thiovulum*.  
234 These cells had a diameter of 12-16  $\mu\text{m}$ , contained 20-30 sulfur globules each (Fig. 3), and occurred in  
235 densities of approximately  $5.5 \times 10^3$  cells/ml. Transmission Electron Microscope (TEM) observations  
236 showed that these large cells were Gram-negative (Fig. 3C-D), and confirmed the existence of 20-30  
237 irregularly shaped sulfur inclusions within each of the cells. Light and TEM imaging revealed *Thiovulum*  
238 cell divisions along the long cell axis (Fig. 3B, C). Short peritrichous filamentous appendages (Fig. 3D)  
239 observed on the surface of the cells resemble those noticed earlier in other *Thiovulum* species (Wirsen  
240 and Jannasch, 1978). Scanning electron microscopy (SEM) revealed the ball-like structure of the sulfur  
241 inclusions in a series of connected *Thiovulum* cells (Fig. 3E). These cells were connected one to the  
242 other via multiples threads (Fig. 3F-G). Energy-dispersive X-ray (EDX) analysis (Fig. 3H-I) confirmed  
243 that the intracellular globules contained sulfur (20.9 - 26.1 %), along with elements common in organic  
244 matter such as carbon (49 - 49.2 %) and oxygen (21.1 - 24.6 %), and a few other elements in low  
245 abundance such as sodium (2.4 - 3.4 %) and phosphorus (1.2 - 2.2 %).

246

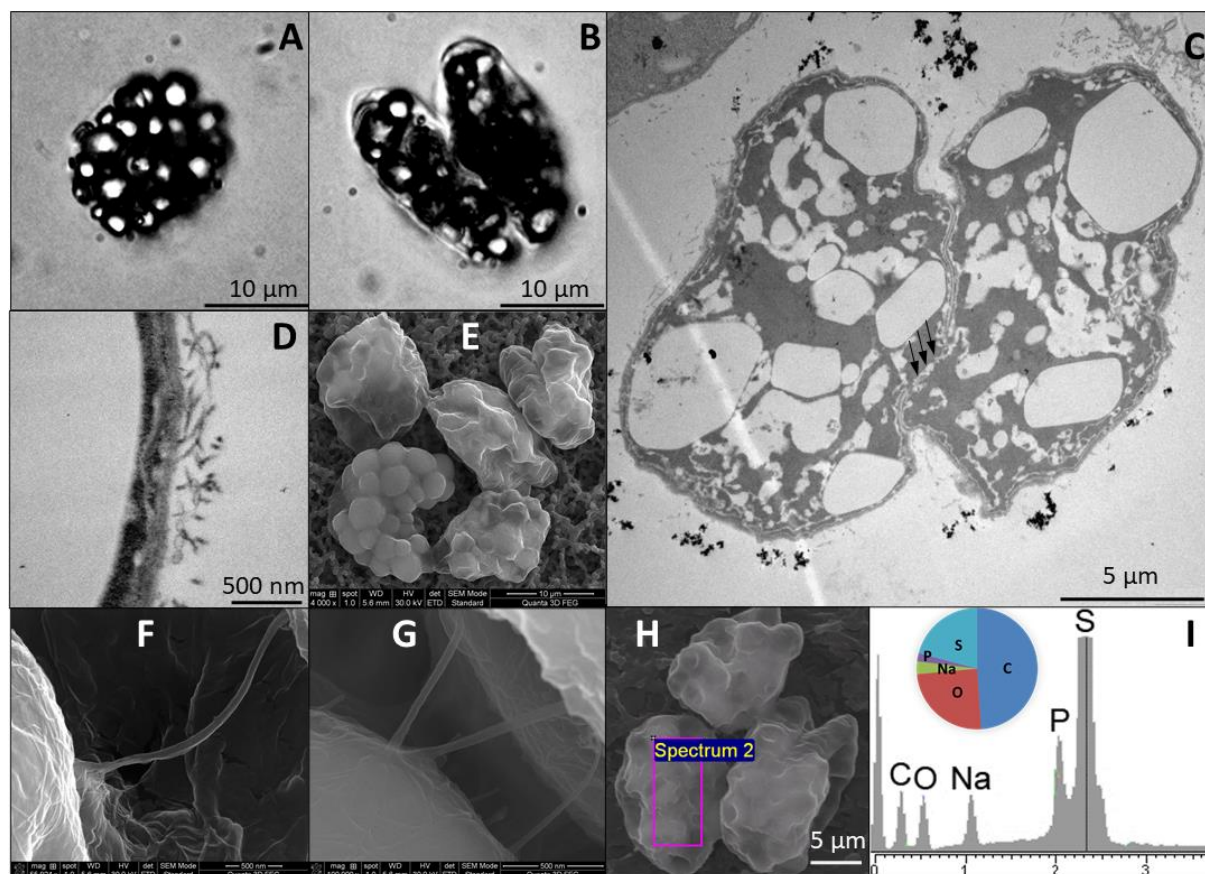

247

248 **Figure 3.** Optical images of giant globular cells colonizing the subsurface veil from Movile Cave (A-  
249 B) including a cell undergoing division (B). Each cell carries 20 to 30 sulfur inclusions (large bright  
250 spots in panels A, B). TEM images of *Thiovulum* show the cellular localization of sulfur inclusions of  
251 various shapes and sizes (panel C, white spots). Ovoid cells divide along their long axis (B, C). The  
252 region where the cell membrane is not fully closed between dividing cells is marked with three black  
253 arrows (C). The cell wall (D) is covered in pili or short flagella. *Thiovulum* cells (E) are often connected  
254 one to another through thread-like structures (F-G). EDX analysis on *Thiovulum* cells (H) inspected  
255 under SEM show the typical elemental composition of the cells (I) and confirm the high sulfur content  
256 of the internal globules. Note that the height of the peaks in the EDX spectra do not correlate with the  
257 element's ratio but with the X-ray signal intensity.

### 258 *Phylogenetic identification and relative abundance of Thiovulum*

259 *Thiovulum* was found in highest abundance (sequence frequency) in Air Bell 2 (35 %), followed by Lake  
260 Room (5 %) and submerged microbial mats (0.9 %) (see pie charts in Fig. 1). Similarly, 35 % of the  
261 amplicon sequences obtained from Air Bell 2 were annotated as *Thiovulum* sp. A detailed community  
262 composition based on 16S rRNA genes obtained from the metagenomic libraries is presented in  
263 Supplementary Fig. 1. An amplicon-based multi-year study on the microbial community composition in  
264 the cave will be published separately.

265 The 16S rRNA sequences obtained from the closed genome of the Movile Cave *Thiovulum*, alongside  
266 other *Thiovulum* sequences obtained from Movile Cave in an earlier study (Porter *et al.*, 2009), formed  
267 a separate clade together with other cave and subsurface, freshwater, *Thiovulaceae*, specifically from  
268 the sulfidic Frasassi caves in Italy (Fig. 4A). This clade stems from one of two clades of marine  
269 *Thiovulaceae*, one of which included *Thiovulum* ES, for which a draft genome is available (Marshall  
270 *et al.*, 2012). Including shorter amplicon sequences of *Thiovulum* from Air Bell 2 in the phylogenetic tree  
271 (Supplementary Fig. 2), highlights the diversity of these bacteria in the cave.

272 A phylogenetic tree constructed from a multilocus alignment of single-copy marker genes from  
273 *Thiovulum* ES (Marshall *et al.*, 2012), the *Thiovulum* genome from Movile Cave, a metagenome  
274 assembled genome from the Frasassi caves, and all available *Sulfurimonas* genomes, resulted in the



275 Frasassi and Movile *Thiovulum* genomes forming a separate clade (Fig. 4B). The Movile Cave genome  
 276 had an overall low similarity to the marine *Thiovulum* (ES) genome (Marshall *et al.*, 2012), with an  
 277 average nucleotide identity (ANI) of 74.49 %, an average amino acid identity (AAI) of 58.33 % (Fig.  
 278 5A-B), and a very low sequence synteny (Fig. 5C). In contrast, The Movile and Frasassi *Thiovulum*  
 279 genomes were highly similar with an ANI of 97 % and an AAI of 95 %. (Fig. 5D, E), as well as a high  
 280 gene synteny (Fig. 5F).

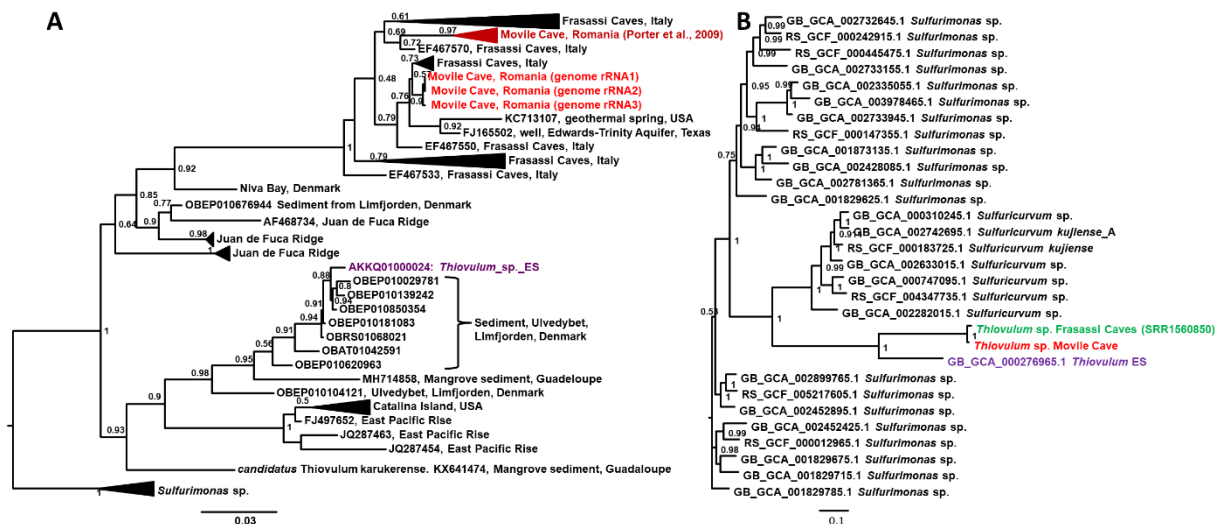

281  
 282 **Figure 4.** Maximum-likelihood placement of the 16S rRNA gene of *Thiovulum* from Movile Cave (A)  
 283 and its genome (B). The 16S rRNA sequences obtained from the complete genome of the Movile Cave  
 284 *Thiovulum* are shown besides all *Thiovulum* sequences available in the SILVA database (V138.1 Quast  
 285 *et al* 2013) using *Sulfurimonas* sp. as an outgroup. A similar 16S rRNA tree using also *Thiovulum*  
 286 amplicon sequences from Movile Cave is shown in Fig. S2. The multilocus protein alignment, of single-  
 287 copy marker genes from the Movile Cave *Thiovulum*, is shown together with that obtained from the  
 288 genome of *Thiovulum* ES and a *Thiovulum*-annotated bin from public metagenomic data from the  
 289 Frasassi caves (SRR1560850). The protein alignment was generated using GTDB-TK (Chaumeil *et al.*,  
 290 2019). The Shimodaira-Hasegawa local support values (ranging from 0 to 1) are shown next to each  
 291 node.

292  
 293 **Genome analysis**

294 The assembly of metagenomic data from Movile Cave resulted in a closed circular genomic sequence  
 295 classified as *Thiovulum* sp. with a genome length of 1.75 Mbp (coverage X330) and a GC content of  
 296 28.4 %. Genome completeness was estimated using CheckM (Parks *et al.*, 2015) at 93 %. Using a  
 297 *Campylobacteraceae* specific set of marker genes did not improve the completeness prediction, however,  
 298 in absence of sufficient reference genomes for this genus, this value likely represents the full set of  
 299 marker genes for *Thiovulum*. CheckM estimated a contamination of 0 % and a strain heterogeneity of 0,  
 300 suggesting the *Thiovulum* genome assembly does not contain any contaminating sequences from  
 301 additional distant or closely related organisms.

302 The genome was analyzed using different tools with the results summarized in Supplementary Dataset  
 303 1. Genes discussed further on are addressed using the notation G2Y-n, where n refers to an incremental  
 304 number. This notation is used by PathwayTools (Karp *et al.*, 2021) and match the supplementary  
 305 metabolic model provided (Supplementary Figures 3,4).

306 The genome contains 1804 coding sequences, of which 1534 could be annotated and 270 remain  
 307 hypothetical proteins, 36 tRNAs genes, 3 rRNA operons and 9 CRISPR arrays in which 5 Type III Cas  
 308 genes were identified (G2Y-562:567), comprising a total of 77 repeats. The same annotation conducted  
 309 de novo on the *Thiovulum* ES genomes suggests, based on COGs (Clusters of Orthologs genes), that the  
 310 Movile, ES and Frasassi strains share 879 core genes (Fig. 5G and Supplementary Dataset 2). The  
 311 Movile strain further shares 33 and 777 genes with the ES and Frasassi strains, respectively. The Frasassi

312 and ES strains had 26 common genes in addition to the core genome. The Movile, ES, and Frasassi  
313 genomes further contained 145, 1201, and 207 individual genes, respectively.

314

### 315 **Carbon metabolism**

316 Similar to *Thiovulum* ES, all genes required for C fixation via the reductive TCA cycle could be  
317 identified in the *Thiovulum* genomes from Movile Cave and from Frasassi. The oxidative TCA cycle is  
318 complete as well in both the *Thiovulum* species with the citrate synthase gene (EC 2.3.3.1) replaced by  
319 ATP-citrate lyase (EC 2.3.3.8; GDY-1367,1367 alpha and beta subunits, respectively) (Fig. 6,  
320 Supplementary Figs 3,4, Supplementary Dataset 1).

321

### 322 **Sulfur metabolism**

323 All annotation approaches (Supplementary Dataset 1) revealed only few genes involved in dissimilatory  
324 sulfur cycling, including two copies of the sulfide:quinone oxidoreductase (G2Y-583, G2Y-1704) that  
325 oxidizes sulfide to polysulfide, and the polysulfide reductase gene *nrfD* (G2Y-67) that carries out the  
326 reverse process. *nrfD* was found in a 3-gene potential operon together with the large subunit of the  
327 assimilatory nitrate reductase (*narB*, G2Y-68) and the *trrB*; tetrathionate reductase subunit B (G2Y-66).  
328 Two rhodanese sulfur transferase proteins (G2Y-815, G2Y-816) were identified in a 6-gene operon  
329 containing two other subunits of a nitrate reductase (*narH*: G2Y-813 and *narG*: G2Y-814). Among the  
330 two other genes in this operon, one is related to cytochrome C (G2Y-811) and the other could not be  
331 annotated (G2Y-810). The *tauE* sulfite exporter was identified (G2Y-644) as part of a 5-gene operon  
332 involved in the transport of molybdate (G2Y-641-643,645 *modCABD*, respectively). Sulfite  
333 dehydrogenase, dissimilatory sulfite reductase (*dsrAB*), the *sox* genes or adenylyl sulfate reductase  
334 (*aprAB*) that carry out the sulfide oxidation to  $SO_4^{2-}$  could not be found by any of the annotation tools  
335 nor by manual BLAST against all sequences available for each of those protein in the UniProt database.

336

### 337 **Nitrogen metabolism**

338 In addition to the membrane-bound nitrate reductases (*nar*, G2Y-813,814) found also in *Thiovulum* ES,  
339 the Movile and Frasassi cave *Thiovulum* possesses also periplasmic nitrate reductases encoded by the  
340 *nap* genes encoded in one operon (G2Y-1099- G2Y-1099, *napAGHB\_F*). The hypothetical protein  
341 encoded in this operon (G2Y-1098) is likely part of the *napF* gene (G2Y-1099) as seen by BLAST  
342 analysis in other *Campylobacteraceae*. Additionally, the gene for hydroxylamine dehydrogenase, which  
343 is often encountered in genomes from *Campylobacterota* (Haase *et al.*, 2017), formerly referred to as  
344 *Epsilonproteobacteria* (Waite *et al.*, 2019), was also identified (G2Y-1392) in a 3-gene operon with two  
345 unannotated hypothetical genes (G2Y-1390, G2Y-1391).

346

### 347 **Chemotaxis and motility**

348 As *Thiovulum* sp. is a highly motile bacterium, we inspected motility and chemotaxis genes. All genes  
349 necessary for flagellar assembly were found in the Movile and Frasassi strains, similarly to *Thiovulum*  
350 ES. The chemotaxis genes *cheV*, *cheA*, *cheW*, *cheD* (G2Y-470:472 *cheVAW*, G2Y-741 *CheD*) and *cheY*  
351 (G2Y-1156) were identified as well as additional *cheY*-like domains (G2Y-  
352 6,20,151,182,251,389,582,712,973,1116,1130,1156',1344,1486,1516). The *cetA* and *cetB* (G2Y-  
353 174:176 *cetABB*') energy taxis genes and the parallel to the *Escherichia coli* aerotaxis (*aer*) (G2Y-1557)  
354 gene were also identified. The *cheX* gene, which was not found in the genome of *Thiovulum* ES, was  
355 identified in the Movile Cave *Thiovulum*. Gene *cheB* was reported missing in *Thiovulum* ES, was  
356 identified in the Movile strain (G2Y-1843) but also in *Thiovulum* ES upon COG reannotation.  
357 Additionally, 9 methyl-accepting chemotaxis proteins were identified (G2Y-  
358 84,85,181,721,740,1225,1487,1557,1836).

359 In addition to flagella genes, (G2Y-3, *fliC*; G2Y-45, *flgA*; G2Y-48, *fliC*; G2Y-184, *flhB*; G2Y-302, *motB*;  
360 G2Y-336, *flgK*; G2Y-338, *flgM*; G2Y-350, *fliN*; G2Y-367, *fliF*; G2Y-442, *flhA*; G2Y-569, *flgH*; G2Y-

361 656, *fliG*; G2Y-666, *lag*; G2Y-781, *fliN*; G2Y-790, *fliI*; G2Y-928, *flgE*; G2Y-1052, *fliS*; G2Y-1053, *fliD*;  
 362 G2Y-1054, *lag*; G2Y-1107, *flgE*; G2Y-1108, *flgD*; G2Y-1122, *flgB*; G2Y-1199, *fliH*; G2Y-1218, *fliM*;  
 363 G2Y-1222, *fliF*; G2Y-1250, *fliR*; G2Y-1258, *flgI*; G2Y-1331, *fliL*; G2Y-1458, *motA*; G2Y-1522, *flgG*;  
 364 G2Y-1568, *fliQ*; G2Y-1728, *flgF*; G2Y-1801, *fliE*; G2Y-1802, *flgC*) the *pilA*, *pilE*, *pilT*, *pilN*, *pulO*, *fimV*  
 365 genes responsible for the formation and retraction of type IV pili were identified.

366

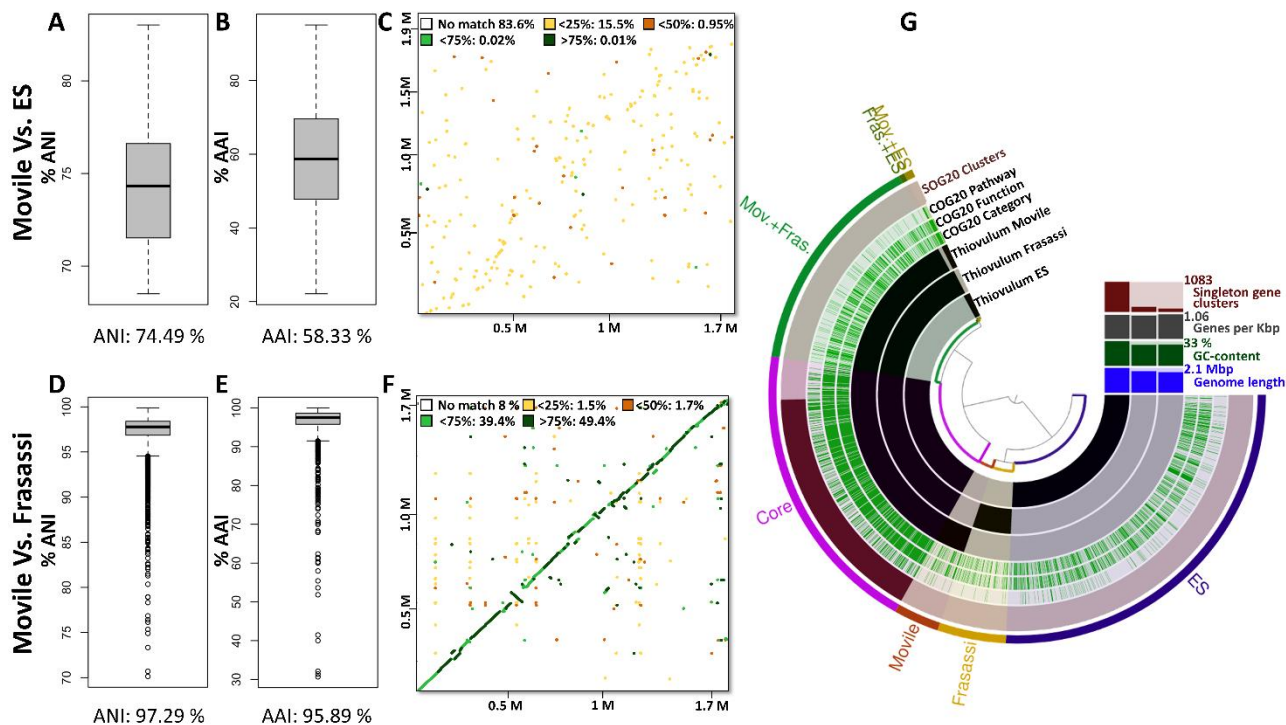

367

368 **Figure. 5** The genome of the Movile *Thiovulum* strain, compared to *Thiovulum* ES (Marshall *et al.*,  
 369 2012) (A-C) and to the Frasassi *Thiovulum* (D-F), using Average Nucleotide Identity (ANI) (A,D),  
 370 Average Amino acid Identity (AAI) (B,E), contig mapping against the genome of the Movile Cave  
 371 *Thiovulum* (C,F) and COG annotation (G).

372

### 373 Gene expression

374 Samples from Air Bell 2 and from the Lake Room were collected for RNA analysis to confirm that  
 375 *Thiovulum* is active in Movile Cave. 16S rRNA of *Thiovulum* dominated all samples, making up more  
 376 than 94 % of the active community (Figure S1) even though *Thiovulum* DNA was rare in the Lake Room  
 377 in our previous samples. Despite the similarity in abundance, the gene expression profiles differ  
 378 significantly between the two sites (Fig. 7). In both the heatmap (Fig. 7A) and the principal component  
 379 analysis (Fig. 7B), the samples from the different environments clustered separately, with clear clusters  
 380 of genes differently expressed in the two cave compartments. Differential expression analysis (Fig. 7C;  
 381 Supplementary Dataset 3) revealed that 222 genes were more expressed in the Lake Room compared to  
 382 Air Bell 2, while the opposite comparison resulted in 42 genes. Over half of the genes more expressed  
 383 in the Lake Room encoded for hypothetical proteins to which no function could be assigned. Retron-  
 384 type reverse transcriptases were the most dominant group of genes (n=15) also exhibiting some of the  
 385 highest transcription level with TPM values up to 19,000. Genes over expressed in samples from Air  
 386 Bell 2 were related to energy generation including cytochromes c and b as well as F-type ATP synthase.  
 387 The entire gene expression data is available in Supplementary Dataset 1 and is additionally depicted in  
 388 Fig. 6 next to the displayed genes or functions.

389

390

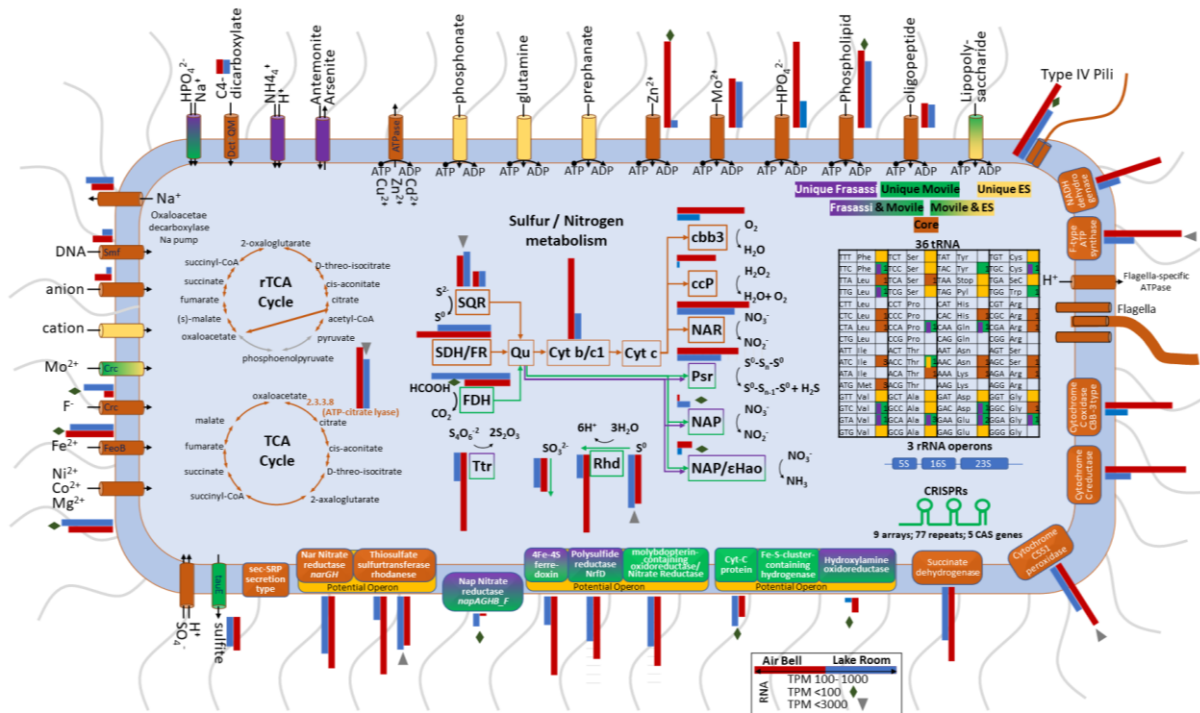

391

392 **Figure 6.** Graphical summary of main components of the Movile, ES, and Frasassi *Thiovulum* strains.  
 393 Elements or reactions colored in green, orange or purple are unique to the species from Movile, ES or  
 394 Frasassi, respectively. Core elements or reactions are colored in brown. Gradient colors indicate  
 395 presence in two of the genomes. Grey arrows in the reductive TCA (rTCA) cycle show missing reactions.  
 396 The sulfur/nitrogen metabolism model was drawn based on Grote *et al.* (2012), Hamilton *et al.* (2014),  
 397 and Poser *et al.* (2014). SQR: sulfide-quinone oxidoreductase, SDH/FR: succinate  
 398 dehydrogenase/fumarate reductase, FDH: formate dehydrogenase, Qu: quinone, Cyt b/c1, quinone  
 399 cytochrome oxidoreductase, cbb3, cytochrome c oxidase; ccP: cytochrome c peroxidase, NAP,  
 400 periplasmic nitrate reductase; NAR, membrane bound nitrate reductase; Psr, polysulfide reductase,  
 401 εHao: Epsilonproteobacterial hydroxylamine oxidoreductase, Ttr: tetrathionate reductase, Rhd:  
 402 rhodanese-related sulfurtransferase. CRISPR were not identified in the genome of *Thiovulum* ES,  
 403 probably due to the current fragmented nature of the data. Comparative gene expression between  
 404 *Thiovulum* in Air Bell 2 (red) and the Lake Room (blue) are shown for each gene depicted where the  
 405 TPM value was above 10. Genes where the TPM value was below 100 or above 1000 are marked with a  
 406 diamond and inverse triangle, respectively. For proteins consisting of multiple subunits, the expression is  
 407 the genes encoding for one of the subunits. For SQR and RhD expression is shown for both copies of the  
 408 genes.



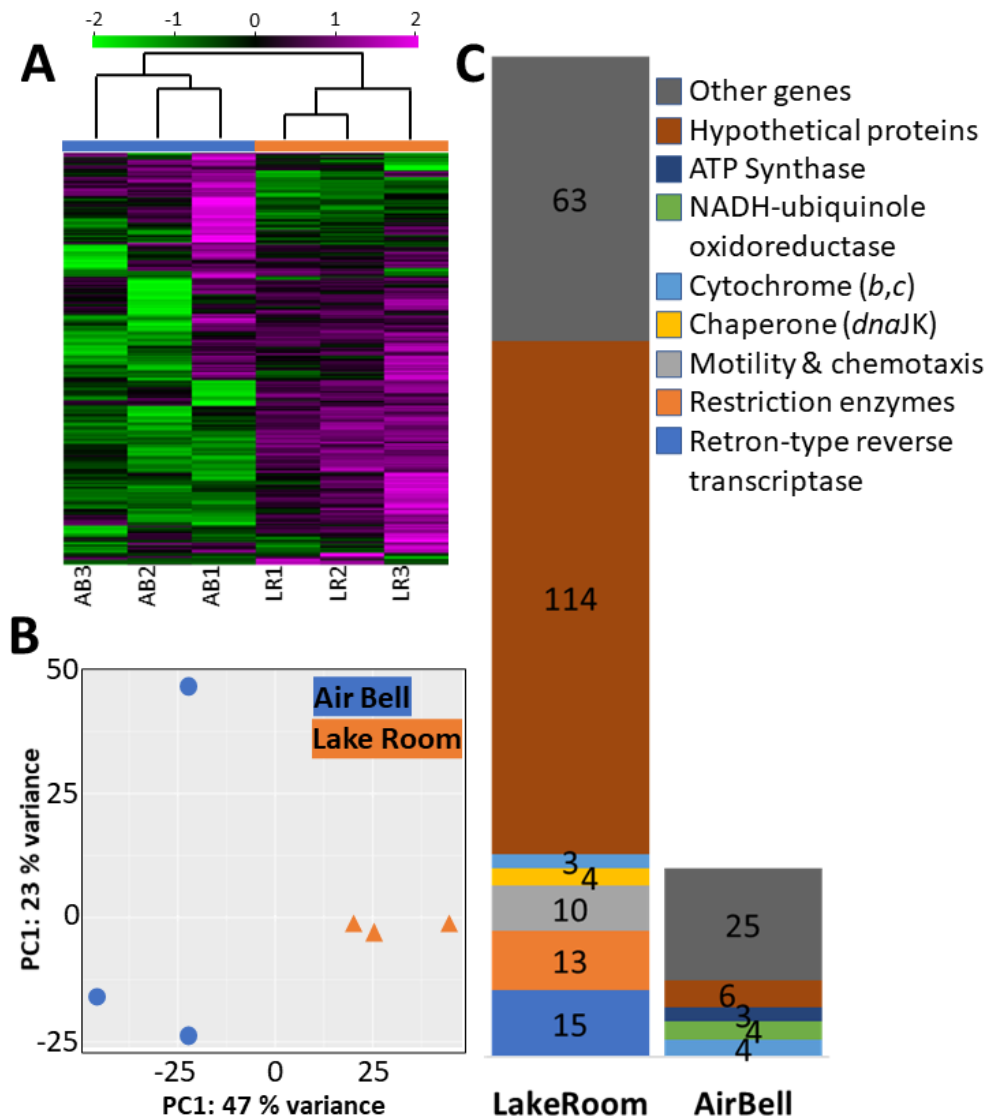

409

410 **Figure 7.** Comparison of mRNA transcriptomic profiles of the Movile Cave *Thiovulum* obtained from  
 411 triplicates samples collected in Air Bell 2 and the Lake Room. A heatmap shows that the two  
 412 environments are separated from one another with clusters of genes expressed more or less in one of the  
 413 two environments (A). The values in the heatmap are log-transformed TPM values and normalized using  
 414 each gene's standard deviation. Principle components analysis (B) demonstrates the separation between  
 415 samples mainly across PC1 likely representing sample location. Differential expression analysis (C)  
 416 revealed that 222 genes are significantly more expressed in the Lake Room as compared to Air Bell 2,  
 417 whereas 48 genes are significantly less expressed

418

#### 419 DISCUSSION

420 In Movile Cave, the oxidation of reduced compounds such as H<sub>2</sub>S, CH<sub>4</sub>, and NH<sub>4</sub><sup>+</sup> is the only primary  
 421 energy source. *Thiovulum*, a large sulfur oxidizer, often found in close proximity to sediments, microbial  
 422 mats or surfaces (Marshall *et al.*, 2012; Jorgensen and Revsbech, 1983; Gros, 2017), is part of the Movile  
 423 chemoautotrophic microbial community, involved in *in situ* carbon fixation, that represents the base of  
 424 the cave's food web that supports an abundant and diverse invertebrate community (Sarbu, 2000; Brad  
 425 *et al.*, 2021). These *Thiovulum* cells, exceeding 15 μm in diameter, are larger than most known sulfur-  
 426 oxidizers, belonging to the group of giant sulfur bacteria (Ionescu and Bizic, 2019). Here we investigated  
 427 the morphological, phylogenetic, and genomic aspects of a fully planktonic *Thiovulum* sp.. We further  
 428 compared its genome to that of the sole other existing genome of *Thiovulum*, strain ES. The latter,

429 originating from a phototrophic marine mat, was reannotated for the purpose of this comparison to  
430 account for new available information, 8 years after its original publication. The main aspects of this  
431 comparison are depicted in Fig. 6 and in more details in Supplementary Fig. 3 and 4. The close  
432 phylogenetic relationship of the Movile Cave *Thiovulum* 16S rRNA gene with sequences from the  
433 Frasassi caves prompted us to recover a *Thiovulum* genome from publicly available data. The obtained  
434 MAG was added to the discussed comparison.

435

#### 436 Hypoxic Air Bell 2 vs. oxic Lake Room

437 *Thiovulum* is not typically dominant in microscopy- or DNA based observations from the Lake Room.  
438 Yet, its rRNA gene dominated over 94 % of the transcriptomic data, similar to its presence in the RNA  
439 samples from the hypoxic Air Bell 2. Nevertheless, it is known that community profiles obtained from  
440 DNA representing pseudo-abundance, and those from RNA, representing degree of activity, can  
441 substantially differ one from the other (e.g. Shu *et al.*, 2019; Bižić-Ionescu *et al.*, 2018). The presence  
442 and high activity of *Thiovulum* at the surface of both the Lake Room and Air Bell 2, environments that  
443 differ significantly in the overlaying atmosphere, points to the metabolic flexibility of cave-dwelling  
444 *Thiovulum* strains and perhaps of the entire genus.

445 While the two expression profiles differed significantly, it is evident (Fig. 6) that most genes  
446 recognizable as involved in cell metabolism had higher expression levels in Air Bell 2, though not all at  
447 statistically significant levels (Supplementary Dataset 1). More than half of the genes overexpressed by  
448 *Thiovulum* in the Lake Room could not be assigned any function making it impossible to understand its  
449 specific metabolic activity in that compartment of the cave. However the high expression of retron-type  
450 reverse transcriptase and Type II restriction enzymes in the Lake Room can be indicative of an ongoing  
451 phage infection (Millman *et al.*, 2020; Pingoud *et al.*, 2014), which may explain the reduced metabolic  
452 activity and elevated expression of defense systems, though only one CRISPR associate gene was  
453 overexpressed. Quantification of viral transcripts showed an overall higher expression in the Lake Room  
454 (Fig. S6), however, at this stage it is not possible to directly connect these transcripts to *Thiovulum*.

455

#### 456 Phylogeny

457 Our phylogenetic analysis of all available *Thiovulum* spp. 16S rRNA sequences revealed two main  
458 clades of marine origin with no clear physical or biogeochemical basis for the separation. All sequences  
459 obtained from sulfidic caves, or subsurface environments (e.g., a drinking water well) formed a subclade  
460 in one of these two clades. This evolutionary transition from a marine environment towards a freshwater  
461 one likely accounts for the differences in sequence and function between *Thiovulum* ES, found in a  
462 phototrophic mat in a marine environment, and the Movile and Frasassi cave *Thiovulum*. This hypothesis  
463 should be further validated as more genomes of *Thiovulum* will become available.

464

#### 465 Sulfur and nitrogen metabolism

466 *Thiovulum* presents several interesting features, such as being one of the fastest bacterial swimmers and  
467 being able to form large veils consisting of interconnected cells. Many sulfur-oxidizing microorganisms  
468 including species of *Thiovulum* form veils by means of what appear to be mucous threads. These threads  
469 are used by the cells to attach to solid surfaces (Fauré-Fremiet and Rouiller, 1958; Fenchel, 1994; Thar  
470 and Fenchel, 2001; De Boer *et al.*, 1961; Wirsén and Jannasch, 1978; Robertson *et al.*, 2015). In marine  
471 settings, such veils keep cells above sediments (Karavaiko *et al.*, 2006) at the oxic-anoxic interface  
472 where the optimal concentration of O<sub>2</sub> and H<sub>2</sub>S can be found.

473 SEM analyses indicated that the cells in the dense agglomeration in Movile Cave are at least partially  
474 interconnected. It has been hypothesized that the coordinated movement of *Thiovulum* cells generates  
475 convective transport of H<sub>2</sub>S or O<sub>2</sub> to the cells (Petroff *et al.*, 2015; Fenchel and Glud, 1998). The fully  
476 planktonic localization of the cells in Air Bell 2 means that *Thiovulum* here cannot use surfaces to place  
477 itself at the oxic-anoxic interphase. O<sub>2</sub> in the Lake Room was shown to penetrate only the upper 1 mm  
478 of the water (Riess *et al.*, 1999), and this is likely similar in the hypoxic Air Bell 2.

479 *Thiovulum* is a sulfide oxidizer as evidenced by the generation and accumulation of sulfur inclusions.  
480 The amount and type of sulfur inclusions in cells is influenced by the concentrations of H<sub>2</sub>S and O<sub>2</sub> in  
481 the environment. Typically, cells store elemental sulfur when H<sub>2</sub>S is abundant in the environment, and  
482 later use the intracellular reserves of sulfur when the sulfide source in the environment is depleted (De  
483 Boer *et al.*, 1961). Sulfur inclusions were also shown to form when the supply of O<sub>2</sub> is limited and as a  
484 result the sulfur cannot be entirely oxidized to soluble sulfite, thiosulfate, or sulfate. Complete depletion  
485 of sulfur inclusions from cells is not likely in Movile Cave where abundant H<sub>2</sub>S is available (245 μM  
486 (Flot *et al.*, 2014)) continuously and where O<sub>2</sub> is scarce in most habitats, and specifically in Air Bell 2  
487 (Sarbu *et al.*, 1996). The analysis of the Movile Cave, ES, and Frasassi strains genomes identified the  
488 SQR gene responsible for the oxidation of sulfide to elemental sulfur. Nevertheless, the genes required  
489 for further oxidizing elemental sulfur to sulfate, via either of the known mechanisms, were not found.  
490 An exception to this is the possible oxidation of sulfite to sulfate via the intermediate adenylyl sulfate  
491 by *Thiovulum* ES, for which the gene encoding the sulfate adenylyl transferase was originally found  
492 (Marshall *et al.*, 2012), yet, according to our re-annotation the necessary adenylyl-sulfate reductase  
493 genes *apr* (EC1.8.4.9) or *aprA* (EC1.8.99.2) are missing.

494 Marshall *et al.* (2012) proposed that *Thiovulum* undergoes frequent (daily) oxic/anoxic cycles that  
495 prevent continuous accumulation of elemental sulfur in the cell. We advance three additional options by  
496 which the Movile Cave and likely the Frasassi caves *Thiovulum*, may avoid sulfur accumulation. First,  
497 the presence of a polysulfide reductase (*nrfD*) suggests that the cells can reduce polysulfide back to  
498 sulfide (Fig. 6). Second, the identification of different rhodanese genes, known to be involved in  
499 thiosulfate and S<sup>0</sup> conversion to sulfite (Poser *et al.*, 2014), and of a sulfite exporter (*tauE*) in the Movile  
500 Cave strain, suggests that *Thiovulum* may be able oxidize elemental sulfur to sulfite and transport the  
501 latter out of the cell. Third, we propose that cave-dwelling *Thiovulaceae* are capable of dissimilatory  
502 nitrate reduction to ammonia (DNRA) using elemental sulfur (Slobodkina *et al.*, 2017), a process already  
503 shown in *Campylobacterota* (e.g. *Sulfurospirillum deleyianum*) (Eisenmann *et al.*, 1995). The Movile  
504 and Frasassi *Thiovulum* contain not only the *nar* (*narGH*) genes for nitrate reduction, but also the  
505 periplasmic *nap* genes known for their higher affinity and ability to function in low nitrate  
506 concentrations (Pandey *et al.*, 2020). Additionally, they harbor the gene for the epsilonproteobacterial  
507 hydroxylamine dehydrogenase (*hao*). Hydroxylamine dehydrogenase is known from other  
508 *Campylobacterota* (e.g. *Campylobacter fetus* or *Nautilia profundicola*) and was shown to mediate the  
509 respiratory reduction of nitrite to ammonia (Haase *et al.*, 2017). In line with the findings of Marshall *et al.*  
510 (2012), the *hao* gene was not found in the genome of *Thiovulum* ES upon re-annotation, suggesting  
511 that the *hao* gene may not be part of the core *Thiovulum* genome. Normally, *Campylobacterota* that  
512 utilize hydroxylamine dehydrogenase do not have formate-dependent nitrite reductase, matching the  
513 annotation of the Movile Cave *Thiovulum*. *Campylobacterota* typically use periplasmic nitrate reductase  
514 (*nap*) and do not have membrane-bound *narGHI* system (Kern and Simon, 2009; Meyer and Huber,  
515 2014). Interestingly, *Thiovulum* ES has only *Nar* systems while the Movile and Frasassi strains have  
516 both types, suggesting that *nap* genes may be a later acquisition by cave-dwelling *Thiovulaceae*.  
517 Nevertheless, while genomic information is suggestive of the presence or absence of specific enzymes  
518 and pathways, additional experiments and gene expression data are required to determine which of the  
519 genes are utilized and under which environmental conditions.

520 Thus, we propose that, if O<sub>2</sub> is available, sulfide is oxidized to elemental sulfur with oxygen as an  
521 electron acceptor (as may have been the case for part of the community at the time of sampling given the  
522 high expression of cytochrome *c* oxidase *cbb3*; Fig. 6). However, when cells are located below the O<sub>2</sub>  
523 penetration depth, the Movile Cave *Thiovulum* may oxidize sulfide using NO<sub>3</sub><sup>-</sup> as an electron acceptor,  
524 in a process of dissimilatory nitrate reduction to ammonium, as documented in other  
525 *Campylobacteraceae*. Our transcriptomic analysis, however, point out that at the time of sampling the  
526 *nap* and *hao* genes were minimally expressed as compared to other sulfur and nitrogen metabolism  
527 genes (Fig. 6, Supplementary Dataset 1). Even though *hao* expression was more than 3 times higher in  
528 samples from Air Bell 2 than in Lake Room, this suggests that the DNRA pathway was not highly active  
529 in the *Thiovulum* community. In contrast, the high expression of both copies of rhodanese genes as well  
530 sulfite exporter (*tauE*) suggest that elemental sulfur may have been converted to sulfite and excreted.

531

## 532 Cell motility and veil formation

533 *Thiovulum* sp. often forms large veils of interconnected cells. The threads connecting the cells are  
534 thought to be secreted by the antapical organelle located at the posterior side of the cell (De Boer *et al.*,  
535 1961; Robertson *et al.*, 2015). Short peritrichous filaments (Fig. 3D) observed on the surface of the cells  
536 from Movile Cave resemble those noticed earlier in *Thiovulum* species and referred to as flagella  
537 (Wirsen and Jannasch, 1978). While all genes necessary for flagella assembly were found in the Movile  
538 Cave, Frasassi and ES *Thiovulum* strains, so were genes for type IV pili. Evaluating available electron  
539 microscopy images, we suggest that these ideas need to be revisited.

540 Our SEM images (as well as previous ones of connected *Thiovulum* cells) show connecting threads that  
541 are not exclusively polar and are much thinner than the stalk-like structure shown by de Boer *et al.* (De  
542 Boer *et al.*, 1961). We propose that these structures are rather type IV pili, which are known, among  
543 other functions, to connect cells to surfaces or other cells (Craig *et al.*, 2019). Alternatively, Bhattacharya  
544 *et al.* (2019) have shown the formation of cell-connecting nanotubes constructed using the same  
545 enzymatic machinery used for flagella assembly. However, it is not possible to determine this in absence  
546 of TEM images of connected cells showing the presence of the reduced flagellar base.

547 We further question the flagellar nature of the peritrichous structures around the cells. Inspecting the  
548 high-resolution electron microscopy images taken by Fauré-Fremiet and Rouiller (1958), there is no  
549 single structure visible resembling a flagellar motor. Additionally, the length of these structures based  
550 on de Boer *et al.* (1961) and a similar image in Robertson *et al.* (2015) suggest that these  $< 3 \mu\text{m}$   
551 structures are too short for typical flagella ( $> 10 \mu\text{m}$  in length, c.f. (Renault *et al.*, 2017)) and are closer  
552 to the 1-2  $\mu\text{m}$  lengths known type for pili. Interestingly, *Caulobacter crescentus* swims at speeds of up  
553 to  $100 \mu\text{m s}^{-1}$  using a single flagellum aided by multiple pili (Gao *et al.*, 2014). In light of this hypothesis,  
554 we inspected the images of the fibrillar organelle at the antapical pole of the cells. The high-resolution  
555 images presented in Fauré-Fremiet and Rouiller (1958) and in de Boer (De Boer *et al.*, 1961) show an  
556 area of densely packed fibrillar structures. Considering our current knowledge in flagellar motor size  
557 (ca. 20 nm) it is highly unlikely that each of these fibres is an individual flagellum, thus, potentially  
558 representing a new flagellar organization. Furthermore, none of our TEM images could reveal flagella  
559 motor-like structures on the cell. Given the high number of flagella-like structure around the cell it is  
560 logical to assume that at least some would be seen in the images taken. Petroff *et al.* (Petroff *et al.*,  
561 2015) investigated the physics behind the 2-dimensional plane assembly of *Thiovulum* veils and  
562 suggested it to be a direct result from the rotational movement attracting cells to each other. Nevertheless,  
563 as seen, SEM images show cells that are physically attached one to the other, suggesting several  
564 mechanisms and steps may be involved. Interestingly, type IV pili retraction can generate forces up to  
565 150 pN known to be involved in twitching motility in bacteria (Craig *et al.*, 2019). If coordinated, these  
566 may be part of the explanation of the swimming velocity of *Thiovulum* which is, at ca.  $615 \mu\text{m s}^{-1}$ , 5 to  
567 10 times higher than that of other flagellated bacteria (Garcia-Pichel, 1989). Thus, genomic information  
568 and re-evaluation of electron microscopy data raise new questions concerning the nature of the  
569 extracellular structures on the surface of *Thiovulum* sp. and call for new targeted investigations into this  
570 topic.

571

## 572 CONCLUSIONS

573 Movile Cave is an ecosystem entirely depending on chemosynthesis. We showed that submerged near-  
574 surface, planktonic microbial accumulations are dominated by *Thiovulum*, a giant bacterium typically  
575 associated with photosynthetic microbial mats. We further showed that *Thiovulum* dominates the active  
576 fraction in surface waters of hypoxic and oxic compartments of the cave, suggesting metabolic flexibility

577 Our results highlight the existence of a clade of cave and subsurface *Thiovulaceae* that based on genomic  
578 information differs significantly from marine *Thiovulum*. The genomes of this planktonic *Thiovulum*  
579 strain as well as that of the highly similar *Thiovulum* from the Frasassi sulfidic caves suggest that these  
580 can perform dissimilatory reduction of nitrate to ammonium, when  $\text{O}_2$  is unavailable. Thus, *Thiovulum*  
581 may play a role in the nitrogen cycle of sulfidic caves, providing readily available ammonia to the  
582 surrounding microorganisms. The coupling of DNRA to sulfide oxidation provides a direct and more  
583 productive source of ammonium.



584 This investigation of three *Thiovulum* genomes, coupled with observations of current and previous  
585 microscopy images, questions the number of flagella the cells have, bringing forth the possibility that  
586 the cells may use type IV pili for rapid movement and cell-to-cell interactions.

587 The collective behavior of *Thiovulum* is still a puzzle and there may be more than one mechanism  
588 keeping the cells connected in clusters or in veils. Our SEM images suggest the cells are connected by  
589 thread-like structures. Petroff *et al.* (2015) show, on another strain, that there is no physical connection  
590 between the cells. They suggest that the swimming behavior of individual cells keeps the cells together.  
591 More research is therefore needed to understand if these different mechanisms are driven by strain  
592 variability, or by different environmental conditions.

593

## 594 ACKNOWLEDGEMENTS

595 The authors thank GESS team for logistics with sampling in the cave. We would also like to thank  
596 Pheobe Laaguiby at the University of Vermont for performing the outstanding Oxford Nanopore  
597 sequencing and Bo Barker Jørgensen, Emily Fleming, Carl Wirsen, and Tom Fenchel for their valuable  
598 suggestions that led to the improvement of the quality of this manuscript. We would also like to thank  
599 the Extreme Microbiome Project (XMP) for providing the DNA extraction reagents and methods as well  
600 as Laura Gray and Mehdi Keddache at Illumina Corp for providing partial sequencing reagents through  
601 its partnership with XMP. T. Brad was supported by a grant of Ministry of Research and Innovation,  
602 project number PN-III-P4-ID-PCCF-2016-0016 (DARKFOOD), and by EEA Grants 2014-2021, under  
603 Project contract no. 4/2019 (GROUNDWATERISK). S. M. Sarbu was supported by a grant of Ministry  
604 of Research and Innovation (UEFISCDI) projects number PN-III-P4-ID-PCE-2020-2843 (EVO-DEVO-  
605 CAVE). J.W. Aerts acknowledges the support from a grant from the User Support Programme Space  
606 Research (grant ALW-GO/13-09) of the Netherlands Organization for Scientific Research (NWO). M.  
607 Bizic was funded through the German Research Foundation (DFG) Eigene Stelle project BI 1987/2-1.  
608 The computational resources for the assembly of the *Thiovulum* genome were provided to J.-F. Flot by  
609 the Consortium des Équipements de Calcul Intensif (CÉCI) funded by the Fonds de la Recherche  
610 Scientifique de Belgique (F.R.S.-FNRS) under Grant No. 2.5020.11; D. Ionescu was funded through the  
611 German Research Foundation (DFG) Eigene Stelle project IO 98/3-1.

612

## 613 REFERENCES

614

615 Aziz RK, Bartels D, Best AA, DeJongh M, Disz T, Edwards RA, *et al.* (2008). The RAST Server:  
616 rapid annotations using subsystems technology. *BMC Genomics* **9**: 75.

617 Bhattacharya S, Baidya AK, Pal RR, Mamou G, Gatt YE, Margalit H, *et al.* (2019). A ubiquitous  
618 platform for bacterial nanotube biogenesis. *Cell Rep* **27**: 334-342.e10.

619 Bižic-Ionescu M, Ionescu D, Grossart HP. (2018). Organic particles: Heterogeneous hubs for  
620 microbial interactions in aquatic ecosystems. *Front Microbiol* **9**: 2569.

621 De Boer WE, La Rivière JWM, Houwink AL. (1961). Observations on the morphology of *Thiovulum*  
622 *majus* Hinze. *Antonie Van Leeuwenhoek* **27**: 447-456.

623 Bolger AM, Lohse M, Usadel B. (2014). Trimmomatic: a flexible trimmer for Illumina sequence data.  
624 *Bioinformatics* **30**: 2114-2120.

625 Brad T, Iepure S, Sarbu SM. (2021). The chemoautotrophically based mobile cave groundwater  
626 ecosystem, a hotspot of subterranean biodiversity. *Diversity* **13**: 128.

627 Brettin T, Davis JJ, Disz T, Edwards RA, Gerdes S, Olsen GJ, *et al.* (2015). RASTtk: a modular and  
628 extensible implementation of the RAST algorithm for building custom annotation pipelines and  
629 annotating batches of genomes. *Sci Rep* **5**: 8365.

630 Caporaso JG, Lauber CL, Walters WA, Berg-Lyons D, Lozupone CA, Turnbaugh PJ, *et al.* (2011).  
631 Global patterns of 16S rRNA diversity at a depth of millions of sequences per sample. *Proc Natl Acad*

- 632 *Sci U S A* **108 Suppl**: 4516–4522.
- 633 Chaumeil P-A, Mussig AJ, Hugenholtz P, Parks DH. (2019). GTDB-Tk: a toolkit to classify genomes  
634 with the Genome Taxonomy Database. *Bioinformatics*. e-pub ahead of print, doi:  
635 10.1093/bioinformatics/btz848.
- 636 Chen Y, Wu L, Boden R, Hillebrand A, Kumaresan D, Moussard H, *et al.* (2009). Life without light:  
637 microbial diversity and evidence of sulfur- and ammonium-based chemolithotrophy in Movile Cave.  
638 *ISME J* **3**: 1093–1104.
- 639 Clark SC, Egan R, Frazier PI, Wang Z. (2013). ALE: a generic assembly likelihood evaluation  
640 framework for assessing the accuracy of genome and metagenome assemblies. *Bioinformatics* **29**:  
641 435–443.
- 642 Craig L, Forest KT, Maier B. (2019). Type IV pili: dynamics, biophysics and functional consequences.  
643 *Nat Rev Microbiol* **17**: 429–440.
- 644 Davis JJ, Wattam AR, Aziz RK, Brettin T, Butler R, Butler RM, *et al.* (2020). The PATRIC  
645 Bioinformatics Resource Center: Expanding data and analysis capabilities. *Nucleic Acids Res* **48**:  
646 D606–D612.
- 647 Eisenmann E, Beuerle J, Sulger K, Kroneck PMH, Schumacher W. (1995). Lithotrophic growth of  
648 *Sulfurospirillum deleyianum* with sulfide as electron donor coupled to respiratory reduction of nitrate  
649 to ammonia. *Arch Microbiol* **164**: 180–185.
- 650 Engel AS. (2015). Bringing microbes into focus for speleology: an introduction. In: Engel AS (ed).  
651 *Microbial Life of Cave Systems*. De Gruyter: Berlin, München, Boston, pp 1–22.
- 652 Eren AM, Esen ÖC, Quince C, Vineis JH, Morrison HG, Sogin ML, *et al.* (2015). Anvi'o: an  
653 advanced analysis and visualization platform for 'omics data Van Gulik W (ed). *PeerJ* **3**: e1319.
- 654 Fauré-Fremiet E, Rouiller C. (1958). Étude au microscope électronique d'une bactérie sulfureuse,  
655 *Thiovulum majus* Hinze. *Exp Cell Res* **14**: 29–46.
- 656 Fenchel T. (1994). Motility and chemosensory behaviour of the sulphur bacterium *Thiovulum majus*.  
657 *Microbiology-sgm* **140**: 3109–3116.
- 658 Fenchel T, Glud RN. (1998). Veil architecture in a sulphide-oxidizing bacterium enhances  
659 countercurrent flux. *Nature* **394**: 367–369.
- 660 Flot J-F, Bauermeister J, Brad T, Hillebrand-Voiculescu A, Sarbu SM, Dattagupta S. (2014).  
661 *Niphargus-Thiothrix* associations may be widespread in sulphidic groundwater ecosystems: evidence  
662 from southeastern Romania. *Mol Ecol* **23**: 1405–1417.
- 663 Ganzert L, Schirmack J, Alawi M, Mangelsdorf K, Sand W, Hillebrand-Voiculescu A, *et al.* (2014).  
664 *Methanosarcina spelaei* sp. nov., a methanogenic archaeon isolated from a floating biofilm of a  
665 subsurface sulphurous lake. *Int J Syst Evol Microbiol* **64**: 3478–3484.
- 666 Gao Y, Neubauer M, Yang A, Johnson N, Morse M, Li G, *et al.* (2014). Altered motility of  
667 *Caulobacter crescentus* in viscous and viscoelastic media. *BMC Microbiol* **14**: 322.
- 668 Garcia-Pichel F. (1989). Rapid bacterial swimming measured in swarming cells of *Thiovulum majus*. *J*  
669 *Bacteriol* **171**: 3560–3563.
- 670 Garrison E, Marth G. (2012). Haplotype-based variant detection from short-read sequencing. *arXiv*  
671 **1207**.
- 672 Ge SX, Son EW, Yao R. (2018). iDEP: an integrated web application for differential expression and  
673 pathway analysis of RNA-Seq data. *BMC Bioinformatics* **19**: 534.
- 674 Grissa I, Vergnaud G, Pourcel C. (2007). CRISPRFinder: a web tool to identify clustered regularly  
675 interspaced short palindromic repeats. *Nucleic Acids Res* **35**: W52–7.
- 676 Gros O. (2017). First description of a new uncultured epsilon sulfur bacterium colonizing marine  
677 mangrove sediment in the caribbean: *Thiovulum* sp. strain karukerense. *FEMS Microbiol Lett* **364**:

- 678 172.
- 679 Grote J, Schott T, Bruckner CG, Glöckner FO, Jost G, Teeling H, *et al.* (2012). Genome and  
680 physiology of a model Epsilonproteobacterium responsible for sulfide detoxification in marine oxygen  
681 depletion zones. *Proc Natl Acad Sci U S A* **109**: 506–510.
- 682 Gruber-Vodicka HR, Seah BKB, Pruesse E. (2020). phyloFlash: Rapid small-subunit rRNA profiling  
683 and targeted assembly from metagenomes Arumugam M (ed). *mSystems* **5**: 521922.
- 684 Guo J, Bolduc B, Zayed AA, Varsani A, Dominguez-Huerta G, Delmont TO, *et al.* (2021). VirSorter2:  
685 a multi-classifier, expert-guided approach to detect diverse DNA and RNA viruses. *Microbiome* **9**: 37.
- 686 Haase D, Hermann B, Einsle O, Simon J. (2017). Epsilonproteobacterial hydroxylamine  
687 oxidoreductase ( $\epsilon$ Hao): characterization of a ‘missing link’ in the multihem cytochrome *c* family. *Mol*  
688 *Microbiol* **105**: 127–138.
- 689 Hamilton T, Jones DS, Schaperdoth I, Macalady J. (2014). Metagenomic insights into S(0)  
690 precipitation in a terrestrial subsurface lithoautotrophic ecosystem. *Front Microbiol* **5**: 756. e-pub  
691 ahead of print, doi: 10.3389/fmicb.2014.00756.
- 692 Herlemann DP, Labrenz M, Jürgens K, Bertilsson S, Waniek JJ, Andersson AF. (2011). Transitions in  
693 bacterial communities along the 2000 km salinity gradient of the Baltic Sea. *ISME J* **5**: 1571–1579.
- 694 Huang Y, Niu B, Gao Y, Fu L, Li W. (2010). CD-HIT Suite: a web server for clustering and  
695 comparing biological sequences. *Bioinformatics* **26**: 680–682.
- 696 Huerta-Cepas J, Szklarczyk D, Heller D, Hernández-Plaza A, Forslund SK, Cook H, *et al.* (2019).  
697 eggNOG 5.0: a hierarchical, functionally and phylogenetically annotated orthology resource based on  
698 5090 organisms and 2502 viruses. *Nucleic Acids Res* **47**: D309–D314.
- 699 Hutchens E, Radajewski S, Dumont MG, McDonald IR, Murrell JC. (2004). Analysis of  
700 methanotrophic bacteria in Movile Cave by stable isotope probing. *Environ Microbiol* **6**: 111–120.
- 701 Ionescu D, Bizic M. (2019). Giant Bacteria. In: *eLS*. John Wiley & Sons, Ltd: Chichester, UK, pp 1–  
702 10.
- 703 Jorgensen BB, Revsbech NP. (1983). Colorless sulfur bacteria, *Beggiatoa* spp. and *Thiovulum* spp., in  
704 O<sub>2</sub> and H<sub>2</sub>S microgradients. *Appl Environ Microbiol* **45**: 1261–1270.
- 705 Kanehisa M, Sato Y, Kawashima M, Furumichi M, Tanabe M. (2016). KEGG as a reference resource  
706 for gene and protein annotation. *Nucleic Acids Res* **44**: D457–D462.
- 707 Kang DD, Froula J, Egan R, Wang Z. (2015). MetaBAT, an efficient tool for accurately reconstructing  
708 single genomes from complex microbial communities. *PeerJ* **3**: e1165.
- 709 Karavaiko GI, Dubinina GA, Kondrat’eva TF. (2006). Lithotrophic microorganisms of the oxidative  
710 cycles of sulfur and iron. *Microbiology* **75**: 512–545.
- 711 Karp PD, Midford PE, Billington R, Kothari A, Krummenacker M, Latendresse M, *et al.* (2021).  
712 Pathway Tools version 23.0 update: software for pathway/genome informatics and systems biology.  
713 *Brief Bioinform* **22**: 109–126.
- 714 Kern M, Simon J. (2009). Electron transport chains and bioenergetics of respiratory nitrogen  
715 metabolism in *Wolinella succinogenes* and other Epsilonproteobacteria. *Biochim Biophys Acta -*  
716 *Bioenerg* **1787**: 646–656.
- 717 Kolmogorov M, Yuan J, Lin Y, Pevzner PA. (2019). Assembly of long, error-prone reads using repeat  
718 graphs. *Nat Biotechnol* **37**: 540–546.
- 719 Kumaresan D, Wischer D, Stephenson J, Hillebrand-Voiculescu A, Murrell JC. (2014). Microbiology  
720 of Movile Cave-A chemolithoautotrophic ecosystem. *Geomicrobiol J* **31**: 186–193.
- 721 Lasca C, Popa R, Sarbu SM. (1994). Le karst de Movile (Dobrogea de Sud). *Rev Roum Geogr* **38**: 85–  
722 94.

- 723 Li D, Liu C-M, Luo R, Sadakane K, Lam T-W. (2015). MEGAHIT: an ultra-fast single-node solution  
724 for large and complex metagenomics assembly via succinct de Bruijn graph. *Bioinformatics* **31**: 1674–  
725 1676.
- 726 Love MI, Huber W, Anders S. (2014). Moderated estimation of fold change and dispersion for RNA-  
727 seq data with DESeq2. *Genome Biol* **15**: 550.
- 728 Marshall IPG, Blainey PC, Spormann AM, Quake SR. (2012). A single-cell genome for *Thiovulum* sp.  
729 *Appl Environ Microbiol* **78**: 8555–8563.
- 730 Meyer JL, Huber JA. (2014). Strain-level genomic variation in natural populations of *Lebetimonas*  
731 from an erupting deep-sea volcano. *ISME J* **8**: 867–880.
- 732 Millman A, Bernheim A, Stokar-Avihail A, Fedorenko T, Voichek M, Leavitt A, *et al.* (2020).  
733 Bacterial retrons function in anti-phage defense. *Cell* **183**: 1551-1561.e12.
- 734 Muyzer G, Waal EC, Uitterlinden AG. (1993). Profiling of complex microbial populations by  
735 denaturing gradient gel electrophoresis analysis of polymerase chain reaction-amplified genes coding  
736 for 16S rRNA. *Appl Environ Microbiol* **59**: 695–700.
- 737 Nercessian O, Noyes E, Kalyuzhnaya MG, Lidstrom ME, Chistoserdova L. (2005). Bacterial  
738 populations active in metabolism of C1 compounds in the sediment of Lake Washington, a freshwater  
739 lake. *Appl Environ Microbiol* **71**: 6885–6899.
- 740 Overbeek R, Olson R, Pusch GD, Olsen GJ, Davis JJ, Disz T, *et al.* (2014). The SEED and the Rapid  
741 Annotation of microbial genomes using Subsystems Technology (RAST). *Nucleic Acids Res* **42**:  
742 D206-14.
- 743 Pandey CB, Kumar U, Kaviraj M, Minick KJ, Mishra AK, Singh JS. (2020). DNRA: A short-circuit in  
744 biological N-cycling to conserve nitrogen in terrestrial ecosystems. *Sci Total Environ* **738**: 139710.
- 745 Parks DH, Imelfort M, Skennerton CT, Hugenholtz P, Tyson GW. (2015). CheckM: assessing the  
746 quality of microbial genomes recovered from isolates, single cells, and metagenomes. *Genome Res* **25**:  
747 1043–1055.
- 748 Patro R, Duggal G, Love MI, Irizarry RA, Kingsford C. (2017). Salmon provides fast and bias-aware  
749 quantification of transcript expression. *Nat Methods* **14**: 417–419.
- 750 Petroff AP, Wu X-L, Libchaber A. (2015). Fast-moving bacteria self-organize into active two-  
751 dimensional crystals of rotating cells. *Phys Rev Lett* **114**: 158102.
- 752 Pingoud A, Wilson GG, Wende W. (2014). Type II restriction endonucleases—a historical perspective  
753 and more. *Nucleic Acids Res* **42**: 7489–7527.
- 754 Porter M, Summers Engel A, Kane T, Kinkle B. (2009). Productivity-diversity relationships from  
755 chemolithoautotrophically based sulfidic karst systems. *Int J Speleol* **38**: 27–40.
- 756 Poser A, Vogt C, Knöller K, Ahlheim J, Weiss H, Kleinstüber S, *et al.* (2014). Stable sulfur and  
757 oxygen isotope fractionation of anoxic sulfide oxidation by two different enzymatic pathways.  
758 *Environ Sci Technol* **48**: 9094–9102.
- 759 Price MN, Dehal PS, Arkin AP. (2010). FastTree 2-approximately maximum-likelihood trees for large  
760 alignments. *PLoS One* **5**: e9490.
- 761 Pruesse E, Peplies J, Glöckner FO. (2012). SINA: Accurate high-throughput multiple sequence  
762 alignment of ribosomal RNA genes. *Bioinformatics* **28**: 1823–1829.
- 763 Quast C, Pruesse E, Yilmaz P, Gerken J, Schweer T, Yarza P, *et al.* (2013). The SILVA ribosomal  
764 RNA gene database project: improved data processing and web-based tools. *Nucleic Acids Res* **41**:  
765 D590-6.
- 766 Renault TT, Abraham AO, Bergmiller T, Paradis G, Rainville S, Charpentier E, *et al.* (2017). Bacterial  
767 flagella grow through an injection-diffusion mechanism Jülicher F (ed). *Elife* **6**: e23136.
- 768 Riess W, Giere O, Kohls O, Saru SM. (1999). Anoxic thermomineral cave waters and bacterial mats



- 769 as habitat for freshwater nematodes. *Aquat Microb Ecol* **18**: 157–164.
- 770 Ritchie ME, Phipson B, Wu D, Hu Y, Law CW, Shi W, *et al.* (2015). Limma powers differential  
771 expression analyses for RNA-sequencing and microarray studies. *Nucleic Acids Res* **43**: e47.
- 772 Robertson LA, Gijs Kuenen J, Paster BJ, Dewhirst FE, Vandamme P. (2015). *Thiovulum*. In: Brenner  
773 DJ, Krieg NR, Staley JT, Garrity GM (eds). *Bergey's Manual of Systematics of Archaea and Bacteria*.  
774 Wiley: New York, pp 1–4.
- 775 Rohwerder T, Sand W, Lascu C. (2003). Preliminary evidence for a sulphur cycle in Movile Cave,  
776 Romania. *Acta Biotechnol* **23**: 101–107.
- 777 Sarbu SM. (2000). Movile Cave: A chemoautotrophically based groundwater ecosystem. In: Wilken  
778 H, Culver DC, Humphreys WF (eds). *Subterranean Ecosystems*. Elsevier: Amsterdam, pp 319–343.
- 779 Sarbu SM, Kane TC. (1995). A subterranean chemoautotrophically based ecosystem. *NSS Bull* **57**: 91–  
780 98.
- 781 Sarbu SM, Kane TC, Kinkle BK. (1996). A Chemoautotrophically Based Cave Ecosystem. *Science*  
782 **272**: 1953–1955.
- 783 Sarbu SM, Popa R. (1992). A unique chemoautotrophically based cave ecosystem. In: Camacho AI  
784 (ed). *The natural history of biospeleology*. Mus. Nat. de Hist. Naturales: Madrid, pp 637–666.
- 785 Schirmack J, Mangelsdorf K, Ganzert L, Sand W, Hillebrand-Voiculescu A, Wagner D. (2014).  
786 *Methanobacterium movilense* sp. nov., a hydrogenotrophic, secondary-alcohol-utilizing methanogen  
787 from the anoxic sediment of a subsurface lake. *Int J Syst Evol Microbiol* **64**: 522–527.
- 788 Seemann T. (2014). Prokka: rapid prokaryotic genome annotation. *Bioinformatics* **30**: 2068–2069.
- 789 Shaffer M, Borton MA, McGivern BB, Zayed AA, La Rosa SL, Solden LM, *et al.* (2020). DRAM for  
790 distilling microbial metabolism to automate the curation of microbiome function. *Nucleic Acids Res*  
791 **48**: 8883–8900.
- 792 Shu D, Guo J, Zhang B, He Y, Wei G. (2019). rDNA- and rRNA-derived communities present  
793 divergent assemblage patterns and functional traits throughout full-scale landfill leachate treatment  
794 process trains. *Sci Total Environ* **646**: 1069–1079.
- 795 Slobodkina GB, Mardanov A V, Ravin N V, Frolova AA, Chernyh NA, Bonch-Osmolovskaya EA, *et*  
796 *al.* (2017). Respiratory ammonification of nitrate coupled to anaerobic oxidation of elemental sulfur in  
797 deep-sea autotrophic thermophilic bacteria. *Front Microbiol* **8**: 87.
- 798 Sylvestre M-N, Jean-Louis P, Grimonprez A, Bilas P, Collienne A, Azède C, *et al.* (2021). *Candidatus*  
799 *Thiovulum* sp. strain imperiosus: The largest free-living epsilon proteobacteriaeota *Thiovulum* strain  
800 lives in marine mangrove environment. *Can J Microbiol*. e-pub ahead of print, doi: 10.1139/cjm-2021-  
801 0101.
- 802 Taboada B, Estrada K, Ciria R, Merino E. (2018). Operon-mapper: a web server for precise operon  
803 identification in bacterial and archaeal genomes. *Bioinformatics* **34**: 4118–4120.
- 804 Tatusov RL, Galperin MY, Natale DA, Koonin E V. (2000). The COG database: a tool for genome-  
805 scale analysis of protein functions and evolution. *Nucleic Acids Res* **28**: 33–36.
- 806 Thar R, Fenchel T. (2001). True chemotaxis in oxygen gradients of the sulfur-oxidizing bacterium  
807 *Thiovulum majus*. *Appl Environ Microbiol* **67**: 3299–3303.
- 808 Vaser R, Sović I, Nagarajan N, Šikić M. (2017). Fast and accurate de novo genome assembly from  
809 long uncorrected reads. *Genome Res* **27**: 737–746.
- 810 Waite DW, Chuvochina MS, Hugenholtz P. (2019). Road map of the phylum *Campylobacterota*. In:  
811 Major Reference Works. *Bergey's Manual of Systematics of Archaea and Bacteria*. pp 1–11.
- 812 Walker BJ, Abeel T, Shea T, Priest M, Abouelliel A, Sakthikumar S, *et al.* (2014). Pilon: an integrated  
813 tool for comprehensive microbial variant detection and genome assembly improvement. *PLoS One* **9**:  
814 e112963.

- 815 Wick RR, Judd LM, Gorrie CL, Holt KE. (2017). Unicycler: resolving bacterial genome assemblies  
816 from short and long sequencing reads. *PLoS Comput Biol* **13**: e1005595.
- 817 Wick RR, Schultz MB, Zobel J, Holt KE. (2015). Bandage: interactive visualization of *de novo*  
818 genome assemblies. *Bioinformatics* **31**: 3350–3352.
- 819 Wirsén CO, Jannasch HW. (1978). Physiological and morphological observations on *Thiovulum* sp. *J*  
820 *Bacteriol* **136**: 765.
- 821
- 822
